1 **Fluid shear stress coupled with narrow constrictions induce cell type-dependent**  
2 **morphological and molecular changes in circulating tumor cells**

3

4 Hamizah Ahmad COGNART<sup>1,2</sup>, Jean-Louis VIOVY<sup>1,2</sup>, Catherine VILLARD<sup>1,2,\*</sup>

5

6 <sup>1</sup>Institut Curie, CNRS UMR168, Paris, France

7 <sup>2</sup>Université PSL, Paris, France

8

9 \*Corresponding author:

10 Postal address: Institut Pierre-Gilles de Gennes pour la microfluidique, 6 rue Jean Calvin,

11 75005 Paris

12 Telephone number: +33 (0)1 40 79 59 03

13 E-mail: [catherine.villard@curie.fr](mailto:catherine.villard@curie.fr)

## 14 **Abstract**

15

16 Cancer mortality mainly arises from metastases, due to cells that escape from a primary  
17 tumor, circulate in the blood as circulating tumor cells (CTCs), permeate across blood vessels  
18 and nest in distant organs. It is still unclear how CTCs overcome the harsh conditions of fluid  
19 shear stress and mechanical constraints within the microcirculation. Here, a model of the  
20 blood microcirculation was established through the fabrication of microfluidic channels  
21 comprising constrictions. Metastatic breast cancer cells of epithelial-like and mesenchymal-  
22 like phenotypes were flowed into the microfluidic device. These cells were visualized during  
23 circulation, analyzed for their dynamical behavior and retrieved post-circulation.  $\gamma$ -H2AX  
24 staining showed significant increase of DNA damage response in epithelial-like SK-BR-3  
25 cells, while gene expression analysis of key regulators of epithelial-to-mesenchymal  
26 transition revealed significant increase of Twist2 relative expression in mesenchymal-like  
27 MDA-MB-231 cells post-circulation. This work documents first results of the changes at the  
28 cellular, subcellular and molecular scales induced by the two main mechanical stimuli arising  
29 from circulatory conditions.

30

## 31 **Introduction**

32

33 Understanding the process of metastasis is a major challenge in the fight against cancer. This  
34 process is a multi-step one that often involves cells migrating from a primary tumor (at 90%  
35 of epithelial origin, i.e. carcinomas) into the blood stream (intravasation), where they reach a  
36 distant organ by re-crossing the endothelial barrier (extravasation). At both cellular and  
37 molecular levels, and in most cases, these events involve the ability of cells to undergo  
38 complex reprogramming processes named the epithelial-to-mesenchymal transition (EMT) at

39 the primary tumor site, followed by the reverse process called MET (mesenchymal-to-  
40 epithelial transition), which may help in establishing distant micro-metastases after the  
41 circulation step.<sup>1-4</sup> Blood circulation, together with gene expression reprogramming,  
42 therefore plays a central role in the metastatic cascade.

43

44 Once in the bloodstream, circulating tumor cells (CTCs) experience shear stress. In addition,  
45 considering that capillaries do not have uniform diameters but are regularly constricted  
46 instead<sup>5</sup>, CTCs encounter various constraints within the microvascular network, leading to  
47 repeated mechanical deformation and eventually to arrest. Although numerous studies have  
48 revealed important influences of mechanical constraints in cancer<sup>6</sup>, surprisingly only a few  
49 works explored the responses of cancer cells to the mechanical stressors provided by the  
50 blood circulation, and most of them were limited to the study of the effect of shear stress.  
51 Malignant cells appeared more resistant than non-malignant cells to shear stress<sup>7,8</sup> yet they  
52 still underwent significant apoptosis<sup>9</sup>, in particular as compared to hematopoietic cells.<sup>10</sup>  
53 Altered cytoskeleton organization in suspended and sheared primary ovarian cells was  
54 observed.<sup>8</sup> Interestingly, the process of suspending cells in and of itself triggers myosin-II  
55 inhibition, leading to increased cell stiffness.<sup>11</sup> All these studies, however, involved flow-  
56 induced shear without topographical constraints, and relied on macroscopic tools that limited  
57 the control of the cell treatment uniformity, preventing single cell studies. The investigated  
58 biomarkers were also rather limited, targeting essentially cell survival.

59

60 Nonetheless, several works have used microfluidic systems to address the effect of the  
61 microvasculature geometry on cells. Pioneering work by Preira et al. investigated the role of  
62 cell deformability in the pathological arrest of leukocytes in the blood microcirculation of the  
63 lungs, by devising a microfluidic system with evenly spaced constrictions.<sup>12</sup> In the field of

64 cancer, using circulated glioblastoma and normal glial cell lines, Khan et al. demonstrated the  
65 cell entry time into the confined space provided by 11  $\mu\text{m}$ -wide diameter microchannels as a  
66 better marker of malignancy than deformability.<sup>13</sup> Au et al. showed that clusters of CTCs  
67 could reorganize reversibly in order to traverse microchannels of 5-10  $\mu\text{m}$ -wide.<sup>14</sup> Nath et al.  
68 flowed HeLa cells across 7  $\mu\text{m}$ -wide constrictions, and demonstrated that cell viability was  
69 reduced by 50%, but that the expression of MMP2, a metalloproteinase involved in stromal  
70 tissue degradation, was unchanged.<sup>15</sup> In a very interesting study, Xia et al. flowed leucocytes,  
71 MDA-MB-231 and MCF-7 cell lines into arrays of pores, which demonstrated a pressure  
72 dependence of the deformation of cells and nuclei, proposing that such studies could guide  
73 the optimization of CTC sorting devices.<sup>16</sup> Overall, microfluidic attempts at mimicking  
74 cancer cells in the blood circulation are still sparse, and are mostly focused on a  
75 phenomenological investigation of their mechanical properties.

76

77 The question of the blood circulation effect on the cell phenotype and its genome, and  
78 ultimately aggressiveness is hardly addressed. The acquisition and maintenance of the key  
79 mesenchymal phenotype for the metastatic process, involving i.e. up-regulation of vimentin  
80 and down-regulation of E-cadherin expressions, require important cellular reprogramming by  
81 the activation of master regulators including transcription factors such as Snail, Twist and  
82 zinc-finger E-box-binding (ZEB), and transforming growth factor, TGF- $\beta$ .<sup>17,18</sup> These  
83 phenotypic changes, however, are not bimodal, and recent studies suggest that disseminating  
84 tumor cells may present diverse and heterogeneous combinations of epithelial and  
85 mesenchymal phenotypic traits.<sup>14,19,20</sup>

86

87 In this article, the main aim is to tackle the least studied component of the metastatic cascade  
88 to date, which is the transient circulation step in the blood stream. More precisely, we will

89 explore the combined influence of shear stress and physical constraints on the characteristics  
90 of circulating cancer cells. The main questions that will be addressed are how do circulation  
91 and constrictions regulate the phenotype, genome integrity and gene expression of CTCs. To  
92 address these questions, cells of two different origins, i.e. epithelial (SK-BR-3) and  
93 mesenchymal (MDA-MB-231) breast cancer cell lines, were circulated in microfluidic  
94 channels using a flow control system to recapitulate the pressure-velocity patterns of the  
95 microcirculation blood flow. While under circulation, the tumor cells were constrained due to  
96 the presence of evenly-spaced multiple constrictions to mimic the mechanical condition in  
97 the blood capillary bed. The ways in which shear flow and mechanical constraints can  
98 promote changes in gene expression were investigated and elaborated based on the common  
99 framework for EMT and its transcription factors (EMT-TFs). Our results showed that  
100 circulation affects the cells at several scales, i.e. at cellular, sub-cellular and molecular levels,  
101 and that some of these changes are modulated by the epithelial or mesenchymal initial cell  
102 type. Therefore, the role of the circulation step seems to go beyond a simple disseminating  
103 function of cancer cells to distant organs. For this reason, it should be considered as an active  
104 step that is likely to modify gene expression of CTCs and possibly their mechanical  
105 properties.

106

## 107 **Results**

108

### 109 Characterization of Metastatic Breast Cancer Cells under Circulation, Confinement and

### 110 Constrictions

111

112 To test the effects of different geometric mechanical constrictions on the flow-induced

113 migration of single tumor cells, five types of geometric microfluidic models were fabricated

114 (Figure 1a). All five types comprised channels 420  $\mu\text{m}$  in length. The “unconfined” type had  
115 a channel height of 20  $\mu\text{m}$ , a value reduced to 15  $\mu\text{m}$  in the “confined” type. Confined type 1,  
116 2 and 3 comprised channels with multiple (11, 7 and 5 respectively) 6  $\mu\text{m}$ -wide constrictions  
117 spaced apart by 26  $\mu\text{m}$ -wide chambers that were 20  $\mu\text{m}$  in length. These microfluidic designs  
118 were calculated for their flow resistance based on Newtonian fluid flow resistance (Figure  
119 1b). A pressure set-point of 10 kPa applied across the whole microfluidic circuit was chosen  
120 in order to achieve the same order of magnitude of flow rate (i.e. approximately 1  $\mu\text{l}/\text{min}$ ) as  
121 the blood flow rate reported in micron-sized capillaries *in vivo*.<sup>21</sup> Either poorly (SK-BR-3) or  
122 highly (MDA-MB-231) metastatic breast cancer cell lines were delivered into these five  
123 types of geometric microfluidic models for single cell mechanical phenotyping by flow-  
124 induced migration. The velocity of these cells through the micro channels was measured  
125 (Figure 1c), with values in the range of a few mm/s in agreement with recent *in vivo* values  
126 reported in the literature.<sup>22</sup> More precisely, mean values close to 18 mm/s were found in the  
127 unconfined condition for both cell lines, reduced to about 10 mm/s and 8 mm/s in the  
128 confined situation for SK-BR-3 and MDA-MB-231 cells, respectively. Then, velocity data of  
129 both cell lines displayed a general trend, in which a longer constriction tends to  
130 systematically induce a lower mean velocity, with mean values of 2.8 mm/s and 5.2 mm/s in  
131 the 60  $\mu\text{m}$  long constriction for SK-BR-3 and MDA-MB-231 cells, respectively. The cell  
132 path trajectories through the micro channels with constrictions were macroscopically  
133 scrutinized and similar behavioral patterns were observed for both cell lines and for two  
134 different pressure set points, as illustrated in Figure 2a for SK-BR-3 cells. A first observation  
135 is the large dispersion (i.e. over two orders of magnitude) of the “total transit time”, i.e. the  
136 total time spent in the constricted channels, whatever the applied pressure set point (Figure  
137 2b). Quite interestingly, these “position versus time graph” curves revealed that the main  
138 factor limiting migration is the arrest in the first constriction. Once this constriction is passed,

139 the subsequent ones are crossed smoothly with minimal arrest (Figure 2b). Both cell types  
140 undergo a strong deformation in the first constrictions (Figure 2d), which increases with the  
141 constriction length as expected from a crude volume conservation hypothesis. This initial  
142 deformation is partly maintained in the rest of the cell journey through the subsequent  
143 constrictions (Figure 2a). Quite interestingly too, the cell residence time in the first  
144 constriction differs between cell types, with mean values of 116 ms for SK-BR-3 cells and 34  
145 ms for MDA-MB-231 cells (Supplementary Table 1). The ratio between the cell residence  
146 time in the first constriction and the total transit time is plotted in Figure 2c, showing that  
147 around 50% of the total transit time is spent in the first constrictions in all constricted  
148 geometries. Let us note that, however, only MDA-MB-231 cells display a significant increase  
149 of residence time as a function of the length of the constriction. Overall, these results suggest  
150 that cancer cells crossing constrictions retain a persistent memory of such an event, which  
151 also seems to depend on the initial cell type. We then explored the consequences of this  
152 morphological plasticity observed at the cellular, subcellular and molecular levels. We  
153 focused our efforts on the nucleus, the biggest organelle in the cell, which was previously  
154 identified as the limiting one for cells in migration through narrow constrictions.<sup>23</sup>

155

156 Effects of Circulation, Confinement and Constrictions on the Morphology of Metastatic

157 Breast Cancer Cells and Their Genome Integrity

158

159 First, we characterized the nuclear morphological features of single tumor cells after being  
160 subjected to confinement and constrictions under flow. Briefly, SK-BR-3 and MDA-MB-231  
161 cells were isolated from the microfluidic system, fixed while in suspension, and their nuclei  
162 stained with DAPI (Figure 3a). Approximately, one thousand cells were collected in one  
163 hour. Therefore, the maximum time over which cells are left in suspension, including the

164 time spent before and after crossing the constrictions, is under an hour. Since each of the five  
165 geometric microfluidic models could impose unique mechanical constraint on the cells, their  
166 cell area, nucleus area, nuclear to cytoplasmic (N:C) ratio, and nucleus aspect ratio (AR)  
167 were quantified for each geometry (Figure 3b). Morphological analysis showed significant  
168 increases of nucleus areas in SK-BR-3 cells in most conditions, with the highest changes  
169 observed as a result of circulation without confinement (channel height of 20  $\mu\text{m}$ ) and with  
170 confinement (channel height of 15  $\mu\text{m}$ ). This suggests that these cells respond strongly to  
171 being suspended and submitted to shear stress, and relatively less to the additional strain  
172 provided by constrictions. Conversely, MDA-MB-231 cells appeared quite insensitive to the  
173 transition from an adherent to a suspended state, and from being circulated. They however  
174 display significant changes in nucleus size when constricted. These trends were similar  
175 regarding cell size. This led to almost unchanged nuclear to cytoplasmic size ratio for both  
176 cell types and conditions, except for the unconfined and confined conditions for SK-BR-3  
177 cells reflecting the large observed relative changes of nucleus area in this cell type. Finally,  
178 the nucleus aspect ratio (computed from an ellipsoidal fit, see Methods) appeared  
179 significantly higher in MDA-MB-231 cells, as already reported by Xia et al.<sup>16</sup>, but was not  
180 affected by any of the stress encountered by the cells. Subsequently, to further investigate  
181 how the morphological changes observed in most circulated conditions as compared to the  
182 adherent control condition affect the genome integrity of the cells, the extents of DNA  
183 damage and repair activity due to circulation, confinement and constrictions were  
184 investigated by staining the cells with  $\gamma$ -H2AX (Phospho-Ser139) antibody, a marker for  
185 DNA damage response (Figure 4a). The integrated densities of  $\gamma$ -H2AX in the nucleus and  
186 cytoplasm fractions were measured and their ratio were represented (N:C ratio, see Figure  
187 4b). These results showed that DNA damage and repair activity is significantly activated in  
188 SK-BR-3 cells in all circulated groups, as compared to the uncirculated (control) group. In



189 MDA-MB-231 cells, DNA damage and repair activity is constitutively activated (N:C ratio >  
190 1) even in the control, and appears to be increased with a statistical significance only in the  
191 “unconfined” circulated case. Further analysis will be needed to understand this point but we  
192 can note that a similar trend (also not statistically significant) is observed for the N:C ratio in  
193 size.

194

### 195 Gene Expression Analysis of Key Regulators of Epithelial-to-Mesenchymal Transition

196

197 Next, a panel of EMT transcriptional signatures were investigated for possible induced  
198 changes in tumor cells due to circulation, confinement and constrictions. Quite interestingly,  
199 significant changes in gene expression of EMT transcriptional signatures were observed in  
200 response to circulation alone (Figure 5). These changes are associated with an increase of  
201 expression in SK-BR-3 cells, 5 over 9 genes being significantly up-regulated (E-cadherin,  
202 Snail1, Twist2, ZEB1 and ZEB2). For MDA-MB-231 cells, a similar yet less pronounced  
203 trend was observed (i.e. only Snail1 and ZEB2 were significantly overexpressed), and  
204 notably, down-regulations of N-cadherin, Twist1 and Twist2 were observed. When the  
205 effects of confinement and constrictions were added on top of circulation, no significant  
206 changes were detected for most of the transcriptional signatures investigated for both cell  
207 lines. SK-BR-3 cells however, displayed significant down-regulated genes for Vimentin and  
208 Snail2 when compared to the unconfined circulated condition (Figure 6a). Quite a different  
209 situation was observed for MDA-MB-231 cells. Amongst the nine EMT transcriptional  
210 signatures tested, only E-cadherin was significantly down-regulated while Twist2 revealed a  
211 striking increase in relative expression for all conditions (Figure 6b). Since Twist2 is known  
212 to play a role in tumor progression in breast cancer<sup>24</sup>, even though its expression has been  
213 less explored than that of Twist1, we decided to measure its expression and cell localization.

214

## 215 Co-localization of Twist2 Protein

216

217 The co-localization of Twist2 protein in the nucleus and cytoplasm was determined in SK-  
218 BR-3 and MDA-MB-231 cells in response to fluid shear stress alone, and to the combination  
219 of fluid shear stress and mechanical constraints by staining with Twist2 antibody (Figure 7a).  
220 The integrated densities of Twist2 in the nucleus and cytoplasm fractions were measured and  
221 represented as N:C ratio (Figure 7b). SK-BR-3 cells in the circulated groups exhibited  
222 significant increases of nuclear co-localization of Twist2 as compared to the control group.  
223 On the other hand, MDA-MB-231 cells in the circulated groups exhibited either maintained  
224 N:C levels of Twist2 localization or significant increases of cytoplasmic co-localization of  
225 Twist2 in two of the constricted conditions as compared to the control group.

226

## 227 **Discussion**

228

229 Circulation of detached cancer cells within PDMS microchannels provides a foremost model  
230 to comprehend the fate of CTCs during their transient existence into the blood circulation. In  
231 the present work, we have studied several aspects of this fate, starting from the dynamical  
232 behavior of cells that were flow-driven into constrained microchannels. Our data highlight  
233 differential mechanical characteristics of poorly versus highly metastatic cancer cell lines in  
234 terms of deformability and plasticity. In the literature, the mechanical phenotype of cells is  
235 emerging as a potential biomarker for cell types, particularly cancer cells. Many studies have  
236 reported the usage of microfluidic devices to measure the mechanical phenotypes of cells  
237 including transit time, entry time, cell size, elastic modulus and cell fluidity.<sup>12,25-27</sup> This was  
238 applied to dissociated cells from tumors, in line with previously proposed deformation

239 assays.<sup>28,29</sup> We believe that this is particularly interesting for CTCs, since they are expected  
240 to undergo large mechanical constraints during their crossing of microcapillaries *in vivo*. In  
241 the present study, not surprisingly, higher confinements led to lower average velocities for  
242 cells transiting across a channel with micro constrictions (Figure 1). Cells undergoing flow-  
243 induced migration under 3D confinement with multiple constrictions generally underwent a  
244 significant arrest at the first constriction (Figure 2). Subsequently, they used up a significant  
245 amount of time to cross this first encounter. We interpret these high residence times in the  
246 first constriction as the time needed by the cells to deform in order to conform to the  
247 mechanical constraint of the constriction and to cross it. Once deformed by this first  
248 constriction, their subsequent crossings of constrictions of the same type were significantly  
249 faster. This suggests a capacity to store mechanical deformation on timescales comparable to  
250 the transit time between constrictions.

251  
252 While both cell types studied here are of epithelial breast cancer origins, they exhibit  
253 morphological differences in 2D culture: SK-BR-3 cells display grape-like morphologies and  
254 MDA-MB-231 cells display stellate morphologies. This difference was reflected  
255 pronouncedly in the nuclear morphological analysis between the cell types post-circulation  
256 (Figure 3). Prior to flow, both cell types SK-BR-3 and MDA-MB-231 have similar nucleus  
257 areas ( $P=0.520$ ). The nucleus is the densest organelle of a cell, and its mechanical resistance  
258 should be a strong hindrance to the crossing of constrictions. Therefore, one may expect that  
259 both cell types have similar responses in terms of crossing time. Interestingly however, both  
260 cell types responded inversely to confinement regarding changes in the projected cellular  
261 areas: SK-BR-3 displays significant increases in nucleus and cell areas, while MDA-MB-231  
262 displays significant opposites. This could explain the higher values of transit times with SK-  
263 BR-3 cells, as compared to MDA-MB-231 cells (Supplementary Table 1). The higher

264 average transit times with SK-BR-3 cells as compared to MDA-MB-231 cells could also be  
265 explained by significant differences in initial nucleus aspect ratio between both cell types  
266 (mean nucleus AR of 1.57 and 1.37 for MDA-MB-231 and SK-BR-3 cells, respectively,  
267  $P < 0.001$ ), as already proposed by Xia et al. in a similar context (i.e. the comparison between  
268 MDA-MB-231 and MCF-7 cells, the latter displaying a relatively lower aspect ratio).<sup>16</sup> At  
269 similar volume, a rounder morphology requires a cell to undergo more deformation to  
270 successfully cross constrictions as compared to a more elongated morphology. Fascinatingly,  
271 too, the variations in nuclei and cell morphological parameters between cell types (Figure 3)  
272 are significant yet relatively modest but their consequences on the transit time for the first  
273 constriction are more dramatic, with mean values higher by a factor 3 to 7 in SK-BR-3 as  
274 compared to MDA-MB-231 cells (Supplementary Table 1). This might suggest that the  
275 mechanical response of the cell, considered as a viscoelastic body, is strongly nonlinear, and  
276 display “hardening” (higher apparent modulus) when deformation increases. This raises  
277 intriguing and, to our knowledge, not fully understood questions regarding the mechanics of  
278 the nucleus.<sup>25,27</sup> Different experimental tools would be needed to address this question in  
279 detail, as it is difficult to characterize different cell samples based on transit time data only.<sup>30</sup>  
280  
281 Studies on DNA damage response (DDR) to mechanical stress, particularly fluid shear stress,  
282 mechanical confinement and constrictions are still scarce,<sup>31</sup> yet they are slowly emerging  
283 within the last years. DDR is a series of coordinated responses designated to remove damage  
284 incurred to the genome.<sup>32</sup> Using transformed cell lines, Singh et al. reported that lamins A/C,  
285 essential nuclear envelope proteins, are required for maintaining genomic stability and that  
286 their depletion stalls DDR.<sup>33</sup> Later, Davidson et al. associated the role of lamins A/C and  
287 DNA damage with migration-induced nuclear deformations in fibroblasts.<sup>23</sup> Several  
288 additional studies emerged, reporting that the genomic instability caused by migration-

289 induced nuclear deformation and DNA damage promotes cancer heterogeneity.<sup>34–36</sup>  
290 Furthermore, Jacobson et al. reported and identified changes in transcripts from RNA-  
291 sequencing of neutrophil-like cells in response to migration and constriction stress.<sup>37</sup> This  
292 establishes an interesting interplay between nuclear mechanics, genome integrity and  
293 phenotypic transformation. Here, tumor cells that underwent circulation, confinement and  
294 constrictions indeed were found to present increased levels of DNA damage marker,  $\gamma$ -H2AX  
295 (Figure 4). As compared to MDA-MB-231 cells, SK-BR-3 cells exhibited more significant  
296 increases in nuclear co-localization of  $\gamma$ -H2AX. Simplistically, this could suggest that DDR  
297 is more weakly activated by physical mechanical constraints in MDA-MB-231 than in SK-  
298 BR-3 cells. Upon closer inspection, however, DDR is more than twice higher in MDA-MB-  
299 231 (mean N:C ratio: 0.474) than in SK-BR-3 (mean N:C ratio: 1.24) cells at baseline, i.e.  
300 prior to flow. COSMIC, the Catalogue of Somatic Mutations in Cancer  
301 (<http://cancer.sanger.ac.uk>) reported 4 gene mutations in SK-BR-3 cells and a whopping 174  
302 gene mutations in MDA-MB-231 cells.<sup>38</sup> This may imply that DDR mechanisms are more  
303 active in MDA-MB-231 than in SK-BR-3 cells due to a higher number of gene mutations,  
304 already in the absence of stress. The specific contribution of cell deformation to DDR thus  
305 may appear smaller in relative value in MDA-MD-231, simply because other non-mechanical  
306 causes of activation are more active. Our results, however, may also reflect a more  
307 fundamental property of mesenchymal-like cells, i.e. a better ability to deform without  
308 inducing further DNA damage.  
309  
310 The plasticity of EMT in cells from aggressive tumors enables them to switch from  
311 proliferative to invasive phenotypes and vice versa.<sup>39,40</sup> It has been vastly observed in mouse  
312 mammary tumor models that the initiation of EMT can occur during the early stages of  
313 tumorigenesis and progress during its later stages.<sup>41–44</sup> The EMT process is considered as a

314 hallmark-facilitating program as well as having influence on pathways linked to tumor  
315 progression and metastatic dissemination. This raises the question of the status of CTCs  
316 amongst the spectrum of functional and morphological characteristics, and notably the  
317 epithelial and mesenchymal ones. It was proposed that CTCs have had undergone EMT or  
318 are still continuously undergoing the transition while in the circulation.<sup>45</sup> While it has been  
319 reported at the cellular level that the functional roles of the cytoskeleton modulate suspended  
320 cell mechanics and that of substrate-adhered cells,<sup>11</sup> here we would like to address how  
321 transformations from mechanical stress, particularly that of fluid shear stress and mechanical  
322 constraints undergone by CTCs in the circulation, may induce changes in cells at the  
323 molecular level. Imani et al. recently carried out a meta-analysis on EMT transcription factors  
324 (EMT-TFs) studies reported on metastatic breast cancer and highlighted Twist1, Snail1,  
325 Snail2, and ZEB1 as key EMT-TFs that are involved in metastatic breast cancer through  
326 different signaling cascades.<sup>46</sup> Here, we showed that, in SK-BR-3 and MDA-MB-231 cells,  
327 there is a substantial relationship between EMT-TFs and mechanical stress from fluid shear  
328 stress and mechanical constraints mimicking those present in the microcirculation – the route  
329 that CTCs take in order to disseminate (Figure 5). Amongst the EMT markers tested, the ZEB  
330 family, Twist1 and N-cadherin did not show any significant difference, while Vimentin,  
331 Snail2 and E-cadherin genes were significantly down-regulated. Further work is necessary  
332 for a fully consistent explanation of these first results. Some significant pictures arise,  
333 however, notably, for MDA-MB-231 cells, a systematic overexpression in all confined  
334 conditions of Twist2, a nuclear protein playing the role of distinct tissue-restricted  
335 transcription factor (Figure 6).<sup>47</sup> The central role of Twist2 in embryogenesis and  
336 mesodermal development, and its targeting of multiple genes coding for cell-fate proteins  
337 inevitably links them to cancer and oncogenesis.<sup>48</sup> This gene has also been reported to be  
338 involved in metastasis formation through EMT, thereby facilitating cancer cell invasion in

339 epithelium-based cancers.<sup>49,50</sup> It was also reported that the EMT program might be activated  
340 transiently through nuclear Twist2 in the tumor invasion front to facilitate cancer cell  
341 invasion and metastasis.<sup>24</sup> An overexpression of Twist2 in circulated MDA-MB-231 shed  
342 light on the singularity of Twist2 as compared to Twist1, and its possible activation under  
343 certain conditions of stress. In our case, this refers to shear stress. In addition to this gene  
344 expression pattern, we observed heterogeneous co-localizations of Twist2 protein between  
345 the nucleus and the cytoplasm (Figure 7). At baseline, Twist2 was co-localized much more in  
346 the cytoplasm of SK-BR-3 (mean N:C ratio: 0.541) than that of MDA-MB-231 (mean N:C  
347 ratio: 1.151) cells. While significant decreases of N:C ratio of Twist2 in MDA-MB-231 cells  
348 flowing into constrictions could be put in connection with the significant decrease in nucleus  
349 and cell areas (Figure 3), significant increases of N:C ratio of Twist2 in SK-BR-3 cells for all  
350 circulation experiments ( $P < 0.001$ ) highly suggest a link between nuclear Twist2 and EMT in  
351 circulating SK-BR-3.

352

353 In this study, it was observed that epithelial-like SK-BR-3 cells underwent more stark  
354 changes in (1) cellular behavior, (2) morphological features and (3) DDR mechanisms, as  
355 compared to mesenchymal-like MDA-MB-231 cells after exposure to mechanical stress from  
356 fluid shear stress and mechanical constraints. The epithelial versus mesenchymal status of  
357 these cells might contribute to the difference in response to applied mechanical stimuli  
358 between cell types. SK-BR-3 cells exhibit epithelial-like morphologies (which suggests  
359 higher rigidity) while MDA-MB-231 cells exhibit mesenchymal-like morphologies, which  
360 suggests higher deformability. These findings suggest that circulation may have a selective  
361 effect on a population of CTCs with a pre-existing heterogeneity, e.g. in terms of survival  
362 (more detrimental to epithelial-like phenotype), penetration in organs capillaries (favoring the

363 more flexible mesenchymal phenotype), and/or cell arrests leading to extravasation

364 (oppositely favoring the more rigid epithelial one).

365

366 In conclusion, flowing cancer cells from cell lines in micro channels, in conditions tailored to

367 mimic those encountered in the blood flow, has shown significant impacts on cellular

368 processes that can lead to changes in morphological features and genetic expressions. More

369 specifically, this circulation process encompasses (1) the hydrodynamic shear stress from

370 blood flow and (2) the mechanical deformations from the geometrical constrictions of the

371 microvasculature. It was shown that changes in morphological features and genetic

372 expressions from this circulation process differ from one cell type to another. Notably, two

373 cell lines presenting an epithelial-like and mesenchymal-like state, respectively, have

374 different responses to different mechanical stress. Therefore, this work strongly suggests that

375 the mechanical process of circulation in the blood flow may have a significant effect on cells

376 at morphological and gene expression level, and that this effect is cell type-dependent.

377

378 Since circulation in the blood is a necessary step in a large fraction of metastatic

379 dissemination events (except for dissemination through the lymphatic system), these findings

380 suggest that this step should not be ignored when trying to comprehend the metastatic process

381 as a whole. Future research efforts should involve (1) an increase in the number of

382 constriction encounter events, through the courtesy of a more elaborate microfluidic design,

383 (2) a more detailed study of the morphological recovery of cells post-constrictions, (3)

384 potential DNA damage repair processes, (4) a comparison of the migratory potential of cells

385 before and after transformation by the circulation and constrictions, and (5) the use of CTCs

386 from patients. This latter study is also challenging, due to the rarity of CTCs. Of course, these

387 studies should be performed in light of and in parallel with the current evolution of the



388 general understanding of the instability of cancer cells and CTCs, and notably the EMT and  
389 MET. This should help to achieve a more in-depth understanding of the molecular  
390 mechanisms activated or repressed in CTCs in the blood microcirculation from  
391 hydrodynamic shear stress and mechanical deformations.

392

## 393 **Methods**

394

### 395 Photo-Masks Design

396

397 A computer-aided design software application for two-dimensional design and drafting called  
398 QCAD was used to design different types of geometry (Supplementary Figure 1). The total  
399 length of one geometrical channel is 420  $\mu\text{m}$ . Each type of design consists of four 420  $\mu\text{m}$ -  
400 long channels that are arranged in parallel. A control design without constrictions has a  
401 channel width of 26  $\mu\text{m}$ . All constrictions have a width of 6  $\mu\text{m}$  at its narrowest. three types  
402 of designs with different constrictions lengths were prepared. The first type contains 11  
403 constrictions with each measuring 20  $\mu\text{m}$  in length. The second type contains 7 constrictions  
404 with each measuring 40  $\mu\text{m}$  in length. The third type contains 5 constrictions with each  
405 measuring 60  $\mu\text{m}$  in length. The constrictions are connected with a transit channel 20  $\mu\text{m}$  by  
406 26  $\mu\text{m}$  in dimension.

407

### 408 Optical Photolithography

409

410 The above two-dimensional geometrical designs were etched onto a glass substrate with a  
411 chrome layer. The production of this chrome mask was outsourced from Selba S.A.,  
412 Switzerland. From this chrome mask, a silicon master mold was fabricated in a cleanroom

413 where provisions were made to reduce particulate contamination and control other  
414 environmental parameters such as temperature, humidity and pressure (Supplementary Figure  
415 2). A silicon wafer was used as a substrate. A negative photoresist SU-8 is spin-coated onto  
416 the substrate. SU-8 2010 photoresist was used to obtain structures with structure heights of 20  
417  $\mu\text{m}$  and 15  $\mu\text{m}$ . After spin-coating the substrate with SU-8 2010 photoresist, the photoresist-  
418 coated substrate is soft baked at 95°C (Supplementary Table 2a). An optical lithography  
419 mask aligner called MJB4 (SÜSS MicroTec AG, Germany) was used to expose UV light  
420 unto the chrome mask that was aligned on the photoresist-coated substrate. The UV light  
421 exposure dosage was optimized for each of the desired thickness (Supplementary Table 2b).  
422 Post exposure bake at 95°C is carried out directly after exposure. The exposed photoresist  
423 was then developed in a shaking bath of photoresist developer (Supplementary Table 2c).  
424 After development, the developed image was rinsed with fresh developer solution for  
425 approximately 10 seconds, followed by a rinse with Isopropyl Alcohol (IPA) for another 10  
426 seconds. Then, it was air-dried with pressurized air and hard baked for 30 minutes at 300°C.  
427 The fabrication of a silicon master mold is now complete.

428

#### 429 Soft Lithography

430

431 From this silicon master mold, a microfluidic polydimethylsiloxane (PDMS) chip is  
432 fabricated through soft lithography (Supplementary Figure 3). PDMS silicon elastomer,  
433 Sylgard 184 was purchased from Dow Corning (Michigan, USA). It was mixed with the  
434 provided curing agent at a ratio of 9:1 and then poured over the silicon master mold. They  
435 were cured at 70°C and left to harden for 4 hours. After curing, the PDMS stamp was  
436 separated from the silicon master mold. 1.5 mm holes were punctured on the designated areas  
437 of the PDMS stamp in order to create reservoirs. Oxygen plasma treatment was performed to

438 induce permanent bonding and the chip was closed by a glass coverslip. From this, PDMS-  
439 bonded slides were used as chips for the microfluidic system.

440

#### 441 Microfluidic System

442

443 All reagents and cell suspensions used during the experiments (Supplementary Figure 4a)  
444 were stored in pressurized containers that were connected to the microfluidic chip through a  
445 manifold valve (Fluigent, France). An MFCS-8C Flow Controller (Fluigent, France) was  
446 used to control the pressure independently in each container to drive all reagents and cell  
447 suspensions into the microfluidic chip. A heat generator was used to warm the microfluidic  
448 device at 37°C throughout the experimental duration in order to achieve optimal culture  
449 conditions for experiments with live cells. Each microfluidic chip experiment experienced  
450 three major stages (Supplementary Figure 4b). The first stage is the priming of the chip in  
451 which the microfluidic channels were sterilized with 70% Ethanol (EtOH) followed by a  
452 washing step with 1X Phosphate-Buffered Saline (PBS). In order to have non-adhesive  
453 surfaces, the channels were coated with 100% of 1 mg of PLL-g-PEG (Susos AG,  
454 Switzerland) solution that was dissolved in 100 mM of sodium bicarbonate (NaHCO<sub>3</sub>) buffer  
455 at pH 8.5 for 1 hour.<sup>1</sup> The channels were washed with 1X PBS and then filled with serum-  
456 free Dulbecco's modified Eagle's medium (DMEM) with HEPES (ThermoFisher Scientific,  
457 USA). The intermediate stage is the introduction of cells into the chip. A suspension volume  
458 of approximately 5000 cells in serum-free DMEM with HEPES was introduced into the  
459 microfluidic chip. This approximation of cell number was deemed optimal for the  
460 microfluidic models used in order to optimally observe single cell flow-induced migration in  
461 the channels without cell clumping or channel clogging. Here, single cell flow-induced  
462 migration was recorded based on the image acquisition control of frame rate. The image

463 acquisitions of cells crossing the micro channels of constrictions 50 frames per second were  
464 produced using the Basler acA800-510um USB 3.0 camera (Basler AG, Germany). The final  
465 stage is the retrieval of cells from the chip. Following the introduction of cells into the  
466 microfluidic chip, circulation of cells was allowed for 1 hour. Then, the cells were carefully  
467 retrieved from the output reservoir for two follow-up tests. The final volume of retrieved cells  
468 from one microfluidic experiment was approximately 10  $\mu$ L. The first follow-up test was for  
469 molecular genetic analysis and the second follow-up test was for immunofluorescence (IF)  
470 analysis of cellular proteins.

471

## 472 Cell Tissue Culture

473

474 All cell lines were purchased from American Type Culture Collection (Virginia, USA). All  
475 cell culture reagents were purchased from Gibco, ThermoFisher Scientific (Massachusetts,  
476 USA). Human breast cancer cell lines: SK-BR-3 and MDA-MB-231; and epithelial Madin-  
477 Darby canine kidney (MDCK) II cells were cultured in complete Dulbecco's modified  
478 Eagle's medium (DMEM) that was supplemented with 100 U/ml aqueous penicillin, 100  
479 mg/ml streptomycin and 10% fetal bovine serum (FBS). Cells were maintained at 37°C in a  
480 humidified atmosphere containing 5% CO<sub>2</sub> and harvested with TrypLE (1X). Cell  
481 dissociation was deactivated with complete media. Cells were pelleted by centrifugation at  
482 180 x g (relative centrifugal force, RCF) for 5 minutes and then re-suspended in complete  
483 media. The cell suspensions were used only when their viability as assessed by trypan blue  
484 exclusion exceeded 95% before use. Cell viability was determined and calculated as the  
485 number of viable cells divided by the total number of cells within the grids on a  
486 hemocytometer. The cell density of cell suspensions was determined using a hemocytometer.  
487 0.1 mL of 0.4% of trypan blue solution was added to 0.1 mL of cells. The trypan blue

488 solution and cell mixture was loaded into a hemocytometer and examined immediately under  
489 a microscope at low magnification. The number of blue staining cells and the number of total  
490 cells were counted. Cell viability should be at least 95% for healthy log-phase cultures.

491

#### 492 Quantitative Real-Time Polymerase Chain Reaction (qRT-PCR)

493

494 Total RNA extraction was performed using the ARCTURUS® PicoPure® RNA Isolation Kit  
495 (Applied Biosystems, USA). The kit was designed to recover high-quality total RNA  
496 consistently from fewer than ten cells and even from a single cell. Total RNA extraction was  
497 executed as directed by the manufacturer. Total RNA was measured using Qubit RNA  
498 reagents (Invitrogen, USA). Measurements were conducted using the Qubit 3.0 Fluorometer  
499 (Invitrogen, USA). All the RNA samples did not undergo more than two freeze-thaw cycles  
500 to avoid any potential nucleic acid degradation. Total RNA reverse transcription (RT) was  
501 performed using the High-Capacity cDNA Reverse Transcription Kit (Applied Biosystems,  
502 USA). After reverse transcription, the cDNAs were diluted by 10-fold before amplification.  
503 cDNA amplification was performed using KiCqStart® SYBR® Green qPCR ReadyMix™  
504 (Merck, Germany). The mRNA primer designs (Sigma-Aldrich, USA) are listed in the  
505 Supplementary Table 3a. All real-time PCR reactions were performed in triplicates using a  
506 SmartCycler® automated real-time PCR system (Cepheid Inc., USA). Supplementary Table  
507 3b sets the thermal cycling conditions for amplification. All target mRNA expressions were  
508 normalized to reference gene GAPDH. Relative mRNA levels were calculated using the –  
509  $\Delta\Delta C_t$  method.

510

#### 511 Immunofluorescence

512

513 10  $\mu$ L of cell suspensions that were retrieved from the microfluidic chip device as  
514 aforementioned were fixed with equal volume of 4% paraformaldehyde (PFA) and then  
515 dispensed on a poly-L-lysine coated glass slide (Sigma-Aldrich, USA). The cells were  
516 incubated at room temperature for 15 minutes. The fixed cells were washed with 1X PBS and  
517 then permeabilized with 0.1% Triton-X 100 at room temperature for 10 minutes. The cells  
518 were washed with 1X PBS and then blocked with 4% Bovine Serum Albumin (BSA) for 1  
519 hour at room temperature. The cells were washed with 1X PBS and then incubated with  
520 primary antibody cocktail in 2% BSA at room temperature for 2 hours (Supplementary Table  
521 4). The cells were washed twice with 1X PBS and then incubated with secondary antibody  
522 cocktail in 2% BSA at room temperature for 1 hour (Supplementary Table 4). The cells were  
523 washed twice with 1X PBS and then counterstained with ProLong Gold Antifade Mountant  
524 with DAPI (Invitrogen, USA). The slide was mounted with a cover slip and the cells were  
525 visualized using the Leica TCS SP8 confocal laser scanning microscopy platform (Leica  
526 Microsystems, Germany).

527

#### 528 Transit Time Analysis

529

530 Videos from microfluidic experiments were analyzed with ImageJ Version 1.51. The  
531 Mtrack2 plugin was installed on ImageJ. It was used to track the positions of a cell cross a  
532 channel with constrictions (Figure 2a). First, the entire image sequences were converted to  
533 mask. Then, the outline of the channel was subtracted from each image sequence. Finally, the  
534 positions of the cell were measured from each image sequence. This method automatically  
535 churned the measurements of the position vector of the cell that allowed the calculations of  
536 cell velocity and cell residence time. This method is only effective when there is only one cell

537 crossing a channel from beginning to end. Thus, manual tracking was done on image  
538 sequences that had more than one cell crossing the channel within a single time frame.

539

#### 540 Cell Morphological Analysis

541

542 All acquired images were analyzed with ImageJ Version 1.51. Regions of interest (ROIs)  
543 were used to define specific parts (cell and nuclear boundaries) of an image that was  
544 processed independently. Only the pixels within any defined ROI were included in the  
545 calculations when measured. ImageJ's set measurements function allowed the generation of  
546 the following data: area, aspect ratio and integrated density. This method was also used to  
547 measure the protein presence and its localization in a cell. Integrated Density is the product of  
548 "Area" and "Mean Gray Value".

549

#### 550 Statistical Analysis

551

552 All statistical hypothesis testing was conducted using the GraphPad Prism 7 software  
553 (GraphPad Software Inc., USA). An alpha of 0.05 was used as the cut-off for significance.  
554 The Kruskal-Wallis test followed by Dunn's multiple comparisons post hoc test was used to  
555 compare three or more independent samples of equal or different sample sizes. This method  
556 was used to compare data on velocity, transit time and residence time of cells in the  
557 microcirculation on five independent samples from the same applied pressure force. This  
558 method was also used to compare data on nucleus area, nucleus length, nuclear to  
559 cytoplasmic area ratio, nucleus aspect ratio, cell area and nuclear to cytoplasmic ratio of  
560  $\gamma$ H2AX and Twist2 proteins of cells post-microcirculation on six independent samples from  
561 the same applied pressure force. The two-way analysis of variance (ANOVA) followed by

562 Holm-Sidak multiple comparisons post hoc test was used to compare relative expression of  
563 every transcript between two groups (uncirculated and circulated) of two cell types (SK-BR-3  
564 and MDA-MB-231). This method was also used to compare relative expression of nine  
565 transcripts between two groups (unconfined and every confined) for SK-BR-3 and MDA-  
566 MB-231.

567

## 568 **References**

569

- 570 1. Thiery, J. P. & Chopin, D. Epithelial cell plasticity in development and tumor  
571 progression. *Cancer Metastasis Rev.* **18**, 31–42 (1999).
- 572 2. Thiery, J. P. Epithelial-mesenchymal transitions in development and pathologies. *Curr*  
573 *Opin Cell Biol* **15**, 740–746 (2003).
- 574 3. Baum, B., Settleman, J. & Quinlan, M. P. Transitions between epithelial and  
575 mesenchymal states in development and disease. *Semin. Cell Dev. Biol.* **19**, 294–308  
576 (2008).
- 577 4. Aparicio, L. A. *et al.* Clinical implications of epithelial cell plasticity in cancer  
578 progression. *Cancer Lett.* **366**, 1–10 (2015).
- 579 5. MacDonald, I. C., Aharinejad, S., Schmidt, E. E. & Groom, A. C. Luminal  
580 constrictions due to endothelial cells in capillaries of mouse exocrine pancreas.  
581 *Microvasc. Res.* **49**, 64–77 (1995).
- 582 6. Wirtz, D., Konstantopoulos, K. & Searson, P. C. P. C. The physics of cancer: the  
583 role of physical interactions and mechanical forces in metastasis. *Nat. Rev. Cancer* **11**,  
584 522 (2011).
- 585 7. Barnes, J. M., Nauseef, J. T. & Henry, M. D. Resistance to fluid shear stress is a  
586 conserved biophysical property of malignant cells. *PLoS One* **7**, e50973 (2012).



- 587 8. Hyler, A. R. *et al.* Fluid shear stress impacts ovarian cancer cell viability, subcellular  
588 organization, and promotes genomic instability. *PLoS One* **13**, e0194170 (2018).
- 589 9. Mitchell, M. J. & King, M. R. Fluid Shear Stress Sensitizes Cancer Cells to Receptor-  
590 Mediated Apoptosis via Trimeric Death Receptors. *New J. Phys.* **15**, 015008 (2013).
- 591 10. Regmi, S., Fu, A. & Luo, K. Q. High Shear Stresses under Exercise Condition Destroy  
592 Circulating Tumor Cells in a Microfluidic System. *Sci. Rep.* **7**, 39975 (2017).
- 593 11. Chan, C. J. *et al.* Myosin II Activity Softens Cells in Suspension. *Biophys. J.* **108**,  
594 1856–69 (2015).
- 595 12. Preira, P. *et al.* Microfluidic tools to investigate pathologies in the blood  
596 microcirculation. *Int. J. Nanotechnol.* **9**, 529 (2012).
- 597 13. Khan, Z. S. & Vanapalli, S. A. Probing the mechanical properties of brain cancer cells  
598 using a microfluidic cell squeezer device. *Biomicrofluidics* **7**, 11806 (2013).
- 599 14. Au, S. H. *et al.* Clusters of circulating tumor cells traverse capillary-sized vessels.  
600 *Proc. Natl. Acad. Sci. U. S. A.* **113**, 4947–52 (2016).
- 601 15. Nath, B. *et al.* Understanding flow dynamics, viability and metastatic potency of  
602 cervical cancer (HeLa) cells through constricted microchannel. *Sci. Rep.* **8**, 17357  
603 (2018).
- 604 16. Xia, Y. *et al.* Nucleus of Circulating Tumor Cell Determines Its Translocation  
605 Through Biomimetic Microconstrictions and Its Physical Enrichment by  
606 Microfiltration. *Small* **1802899**, e1802899 (2018).
- 607 17. Thiery, J. P. Epithelial–mesenchymal transitions in tumour progression. *Nat. Rev.*  
608 *Cancer* **2**, 442–454 (2002).
- 609 18. Lamouille, S., Xu, J. & Derynck, R. Molecular mechanisms of epithelial-mesenchymal  
610 transition. *Natl. Rev. Mol. Cell Biol.* **15**, 178–196 (2014).
- 611 19. Thiery, J. P. & Lim, C. T. Tumor dissemination: An EMT affair. *Cancer Cell* **23**, 272–

- 612 273 (2013).
- 613 20. Lu, M., Jolly, M. K., Levine, H., Onuchic, J. N. & Ben-Jacob, E. MicroRNA-based  
614 regulation of epithelial-hybrid-mesenchymal fate determination. *Proc. Natl. Acad. Sci.*  
615 **110**, 18144–18149 (2013).
- 616 21. Kornfield, T. E. & Newman, E. A. Measurement of Retinal Blood Flow Using  
617 Fluorescently Labeled Red Blood Cells. *eNeuro* **2**, 2992–2999 (2015).
- 618 22. Gurov, I., Volkov, M., Margaryants, N., Pimenov, A. & Potemkin, A. High-speed  
619 video capillaroscopy method for imaging and evaluation of moving red blood cells.  
620 *Opt. Lasers Eng.* **104**, 244–251 (2018).
- 621 23. Davidson, P. M., Denais, C., Bakshi, M. C. & Lammerding, J. Nuclear deformability  
622 constitutes a rate-limiting step during cell migration in 3-D environments. *Cell. Mol.*  
623 *Bioeng.* **7**, 293–306 (2014).
- 624 24. Mao, Y. *et al.* Significance of heterogeneous Twist2 expression in human breast  
625 cancers. *PLoS One* **7**, e48178 (2012).
- 626 25. Bathe, M., Shirai, A., Doerschuk, C. M. & Kamm, R. D. Neutrophil Transit Times  
627 through Pulmonary Capillaries: The Effects of Capillary Geometry and fMLP-  
628 Stimulation. *Biophys. J.* **83**, 1917–1933 (2002).
- 629 26. Nyberg, K. D. *et al.* Predicting cancer cell invasion by single-cell physical  
630 phenotyping. *Integr. Biol. (Camb)*. **10**, 218–231 (2018).
- 631 27. Ye, T., Shi, H., Phan-Thien, N., Lim, C. T. & Li, Y. Relationship between transit time  
632 and mechanical properties of a cell through a stenosed microchannel. *Soft Matter* **14**,  
633 533–545 (2018).
- 634 28. Huang, H. Cell mechanics and mechanotransduction: pathways, probes, and  
635 physiology. *AJP Cell Physiol.* **287**, C1–C11 (2004).
- 636 29. Allieux-Guérin, M. *et al.* Spatiotemporal Analysis of Cell Response to a Rigidity

- 637 Gradient: A Quantitative Study Using Multiple Optical Tweezers. *Biophys. J.* **96**, 238–  
638 247 (2009).
- 639 30. Nyberg, K. D. *et al.* The physical origins of transit time measurements for rapid, single  
640 cell mechanotyping. *Lab Chip* **16**, 3330–9 (2016).
- 641 31. Miroshnikova, Y. A., Nava, M. M. & Wickström, S. A. Emerging roles of mechanical  
642 forces in chromatin regulation. *J. Cell Sci.* **130**, 2243–2250 (2017).
- 643 32. Jackson, S. P. & Bartek, J. The DNA-damage response in human biology and disease.  
644 *Nature* **461**, 1071–8 (2009).
- 645 33. Singh, M. *et al.* Lamin A/C depletion enhances DNA damage-induced stalled  
646 replication fork arrest. *Mol. Cell. Biol.* **33**, 1210–22 (2013).
- 647 34. Raab, M. *et al.* ESCRT III repairs nuclear envelope ruptures during cell migration to  
648 limit DNA damage and cell death. *Science* **352**, 359–62 (2016).
- 649 35. Denais, C. M. *et al.* Nuclear envelope rupture and repair during cancer cell migration.  
650 *Science* **352**, 353–8 (2016).
- 651 36. Irianto, J. *et al.* DNA Damage Follows Repair Factor Depletion and Portends Genome  
652 Variation in Cancer Cells after Pore Migration. *Curr. Biol.* **27**, 210–223 (2017).
- 653 37. Jacobson, E. C. *et al.* Migration through a small pore disrupts inactive chromatin  
654 organization in neutrophil-like cells. *BMC Biol.* **16**, 142 (2018).
- 655 38. Forbes, S. A. *et al.* COSMIC: somatic cancer genetics at high-resolution. *Nucleic  
656 Acids Res.* **45**, D777–D783 (2017).
- 657 39. Brabletz, T. EMT and MET in metastasis: where are the cancer stem cells? *Cancer  
658 Cell* **22**, 699–701 (2012).
- 659 40. Brabletz, T., Kalluri, R., Nieto, M. A. & Weinberg, R. A. EMT in cancer. *Nat. Rev.  
660 Cancer* **18**, 128–134 (2018).
- 661 41. Damonte, P., Gregg, J. P., Borowsky, A. D., Keister, B. A. & Cardiff, R. D. EMT

- 662 tumorigenesis in the mouse mammary gland. *Lab. Invest.* **87**, 1218–26 (2007).
- 663 42. Trimboli, A. J. *et al.* Direct evidence for epithelial-mesenchymal transitions in breast  
664 cancer. *Cancer Res.* **68**, 937–45 (2008).
- 665 43. Morel, A.-P. *et al.* Generation of breast cancer stem cells through epithelial-  
666 mesenchymal transition. *PLoS One* **3**, e2888 (2008).
- 667 44. Santisteban, M. *et al.* Immune-induced epithelial to mesenchymal transition in vivo  
668 generates breast cancer stem cells. *Cancer Res.* **69**, 2887–95 (2009).
- 669 45. Pasquier, J., Abu-kaoud, N., Thani, H. Al & Rafii, A. Epithelial to Mesenchymal  
670 Transition in a Clinical Perspective. **2015**, 19–21 (2015).
- 671 46. Imani, S., Hosseinfard, H., Cheng, J., Wei, C. & Fu, J. Prognostic Value of EMT-  
672 inducing Transcription Factors (EMT-TFs) in Metastatic Breast Cancer: A Systematic  
673 Review and Meta-analysis. *Sci. Rep.* **6**, 28587 (2016).
- 674 47. Bastid, J., Ciancia, C., Puisieux, A. & Ansieau, S. Role of TWIST proteins in cancer  
675 progression. *Atlas Genet. Cytogenet. Oncol. Haematol.* **18**, 113–24 (2011).
- 676 48. Ansieau, S. *et al.* Induction of EMT by Twist Proteins as a Collateral Effect of Tumor-  
677 Promoting Inactivation of Premature Senescence. *Cancer Cell* **14**, 79–89 (2008).
- 678 49. Yang, J. *et al.* Twist, a master regulator of morphogenesis, plays an essential role in  
679 tumor metastasis. *Cell* **117**, 927–939 (2004).
- 680 50. Thiery, J. P., Acloque, H., Huang, R. Y. J. & Nieto, M. A. Epithelial-Mesenchymal  
681 Transitions in Development and Disease. *Cell* **139**, 871–890 (2009).

682

### 683 **Acknowledgements**

684

685 This work was supported by the French National Research Agency (ANR) as part of the  
686 “Investissements d’Avenir” program (reference: ANR10-NANO0207; Labex and Equipex

687 IPGG), ERCadg Cello (FP7-IDEAS-ERC-321107) and Ecole Doctorale Frontières du  
688 Vivant (FdV) – Programme Bettencourt. We are indebted to Prof. Christine Chomienne-  
689 Thomas and Dr. Benoit Ladoux for constructive comments and fruitful insights. We  
690 thank the IPGG technological platform for technical assistance and support.

691

## 692 **Author Contributions**

693

694 H.A.C., C.V. and J.L.V. designed and conceived the study. H.A.C. planned, performed and  
695 processed the experiments, measurements and data analysis. H.A.C. wrote the manuscript.  
696 C.V. supervised and directed the project. J.L.V. contributed to supervision and interpretation  
697 of results. All authors provided critical feedback and helped shape the research, analysis and  
698 manuscript.

699

## 700 **Competing Interests Statement**

701

702 The authors declare no competing interests.

703 **Figure Legends**

704

705 **Figure 1** Hydrodynamics and velocity measurements in the microfluidic system at a constant  
706 applied pressure of 10 kPa. **(a)** Schematic designs of microfluidic channels without and with  
707 micro constrictions. **(b)** Estimated flow rates of various microfluidic channels. **(c)** Velocities  
708 of SK-BR-3 (left) and MDA-MB-231 (right) cells transiting through various microfluidic  
709 channels. Error bars represent standard deviation. Dunn's multiple comparisons post hoc test.  
710 \*, significance level at 0.033; \*\*, significance level at 0.002; \*\*\*, significance level < 0.001;  
711 ns, not significant.

712

713 **Figure 2** Transit and residence times of metastatic breast cancer cells in the microfluidic  
714 system at a constant applied pressure of 10 kPa. **(a)** Example of an SK-BR-3 cell transiting  
715 through a microfluidic channel with constrictions. **(b)** Position versus time graphs of SK-BR-  
716 3 cells transiting through the same type of microfluidic channel at 1 (left) and 10 (right) kPa.  
717 **(c)** Percentages of cell residence time in the first constriction for SK-BR-3 (left) and MDA-  
718 MB-231 (right) cells in three types of microfluidic channels with micro constrictions. Error  
719 bars represent standard deviation. Dunn's multiple comparisons post hoc test. \*, significance  
720 level at 0.033; \*\*, significance level at 0.002; \*\*\*, significance level < 0.001; ns, not  
721 significant. **(d)** Brightfield images of SK-BR-3 and MDA-MB-231 cells residing in the three  
722 types of micro constrictions.

723

724 **Figure 3** Morphological analysis of SK-BR-3 and MDA-MB-231 cells post-circulation, -  
725 confinement and -constrictions at a constant applied pressure of 10 kPa. **(a)** DAPI staining of  
726 SK-BR-3 (top row) and MDA-MB-231 (bottom row) cells. **(b)** Quantifications of nucleus  
727 area, cell area, N:C ratio and nucleus AR of SK-BR-3 and MDA-MB-231 cells. Error bars

728 represent standard deviation. Mann-Whitney U test, two-tailed used to compare control  
729 groups between cell types. Dunn's multiple comparisons post hoc test. \*, significance level at  
730 0.033; \*\*, significance level at 0.002; \*\*\*, significance level < 0.001; ns, not significant.

731

732 **Figure 4** Genome integrity analysis of SK-BR-3 and MDA-MB-231 cells post-circulation, -  
733 confinement and -constrictions at a constant applied pressure of 10 kPa. **(a)** DAPI (blue) and  
734  $\gamma$ -H2AX (green) staining of SK-BR-3 (top row) and MDA-MB-231 (bottom row) cells. **(b)**  
735 Quantifications of nuclear to cytoplasmic ratios of  $\gamma$ -H2AX integrated densities. Cytoplasmic  
736 co-localization – N:C ratio < 1; nuclear co-localization – N:C ratio > 1. Error bars represent  
737 standard deviation. Dunn's multiple comparisons post hoc test. \*, significance level at 0.033;  
738 \*\*, significance level at 0.002; \*\*\*, significance level < 0.001; ns, not significant.

739

740 **Figure 5** Relative expression (log<sub>2</sub>, mean  $\pm$  s.e.m.) of Vimentin, E-cadherin, N-cadherin,  
741 Snail1, Snail2, Twist1, Twist2, ZEB1 and ZEB2 tested in two metastatic breast cancer cell  
742 types (n=3 per transcript). Holm-Sidak multiple comparisons post hoc test used to compare  
743 relative expression of all transcripts in cells in the uncirculated group with the circulated  
744 group. \*, significance level at 0.033; \*\*, significance level at 0.002; \*\*\*, significance level <  
745 0.001; ns, not significant.

746

747 **Figure 6** Heat map illustration of relative expression (log<sub>2</sub>, mean) and (standard error of  
748 mean) of Vimentin, E-cadherin, N-cadherin, Snail1, Snail2, Twist1, Twist2, ZEB1 and ZEB2  
749 tested in two metastatic breast cancer cell types (n=3 per transcript). Holm-Sidak multiple  
750 comparisons post hoc test used to compare relative expression of all transcripts in cells in the  
751 confined groups with the unconfined group. \*, significance level at 0.033; \*\*, significance  
752 level at 0.002; \*\*\*, significance level < 0.001; ns, not significant. **(a)** SK-BR-3 cells. **(b)**

753 MDA-MB-231 cells.

754

755 **Figure 7** Immunofluorescent analysis of SK-BR-3 and MDA-MB-231 cells post-circulation,

756 -confinement and -constrictions at a constant applied pressure of 10 kPa using Twist2

757 antibody. **(a)** DAPI (blue) and Twist2 (red) staining of SK-BR-3 (top row) and MDA-MB-

758 231 (bottom row) cells. **(b)** Quantifications of nuclear to cytoplasmic ratios of Twist2

759 integrated densities. Cytoplasmic co-localization – N:C ratio < 1; nuclear co-localization –

760 N:C ratio > 1. Error bars represent standard deviation. Dunn's multiple comparisons post hoc

761 test. \*, significance level at 0.033; \*\*, significance level at 0.002; \*\*\*, significance level <

762 0.001; ns, not significant.



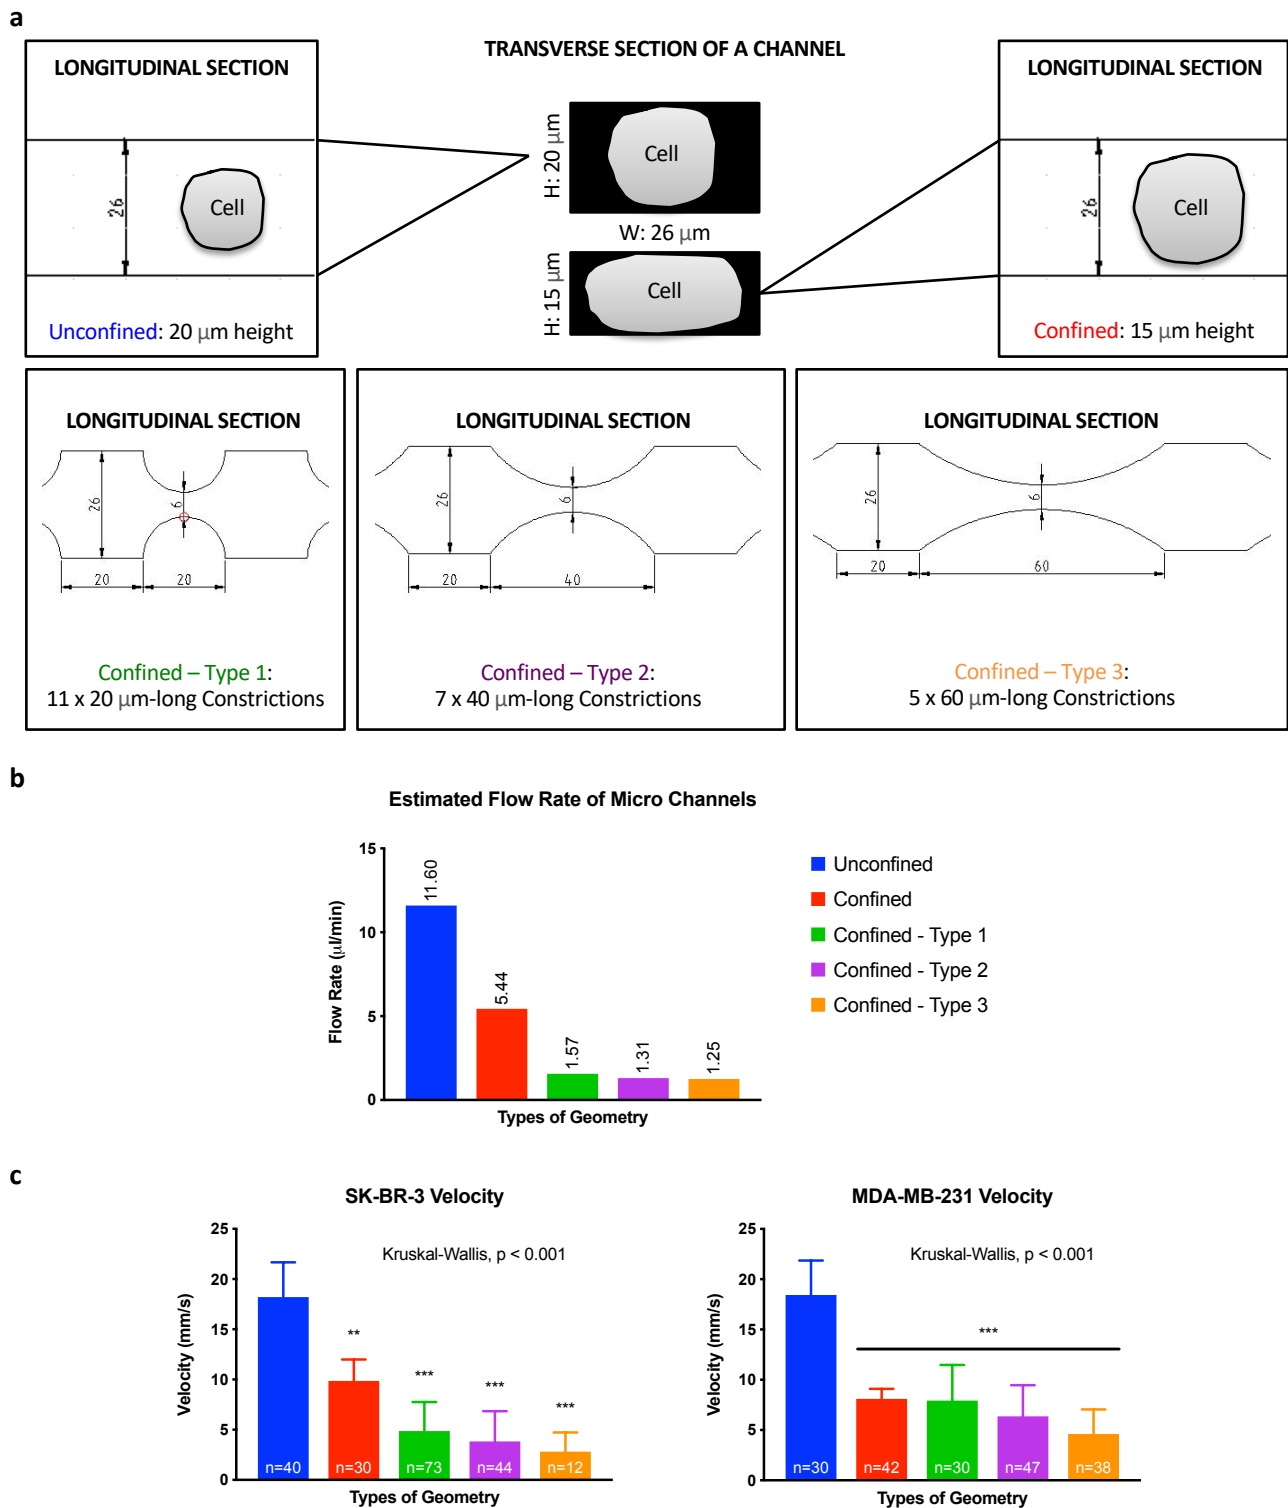

**Figure 1** Hydrodynamics and velocity measurements in the microfluidic system at a constant applied pressure of 10 kPa. **(a)** Schematic designs of microfluidic channels without and with micro constrictions. **(b)** Estimated flow rates of various microfluidic channels. **(c)** Velocities of SK-BR-3 (left) and MDA-MB-231 (right) cells transiting through various microfluidic channels. Error bars represent standard deviation. Dunn's multiple comparisons post hoc test. \*, significance level at 0.033; \*\*, significance level at 0.002; \*\*\*, significance level < 0.001; ns, not significant.

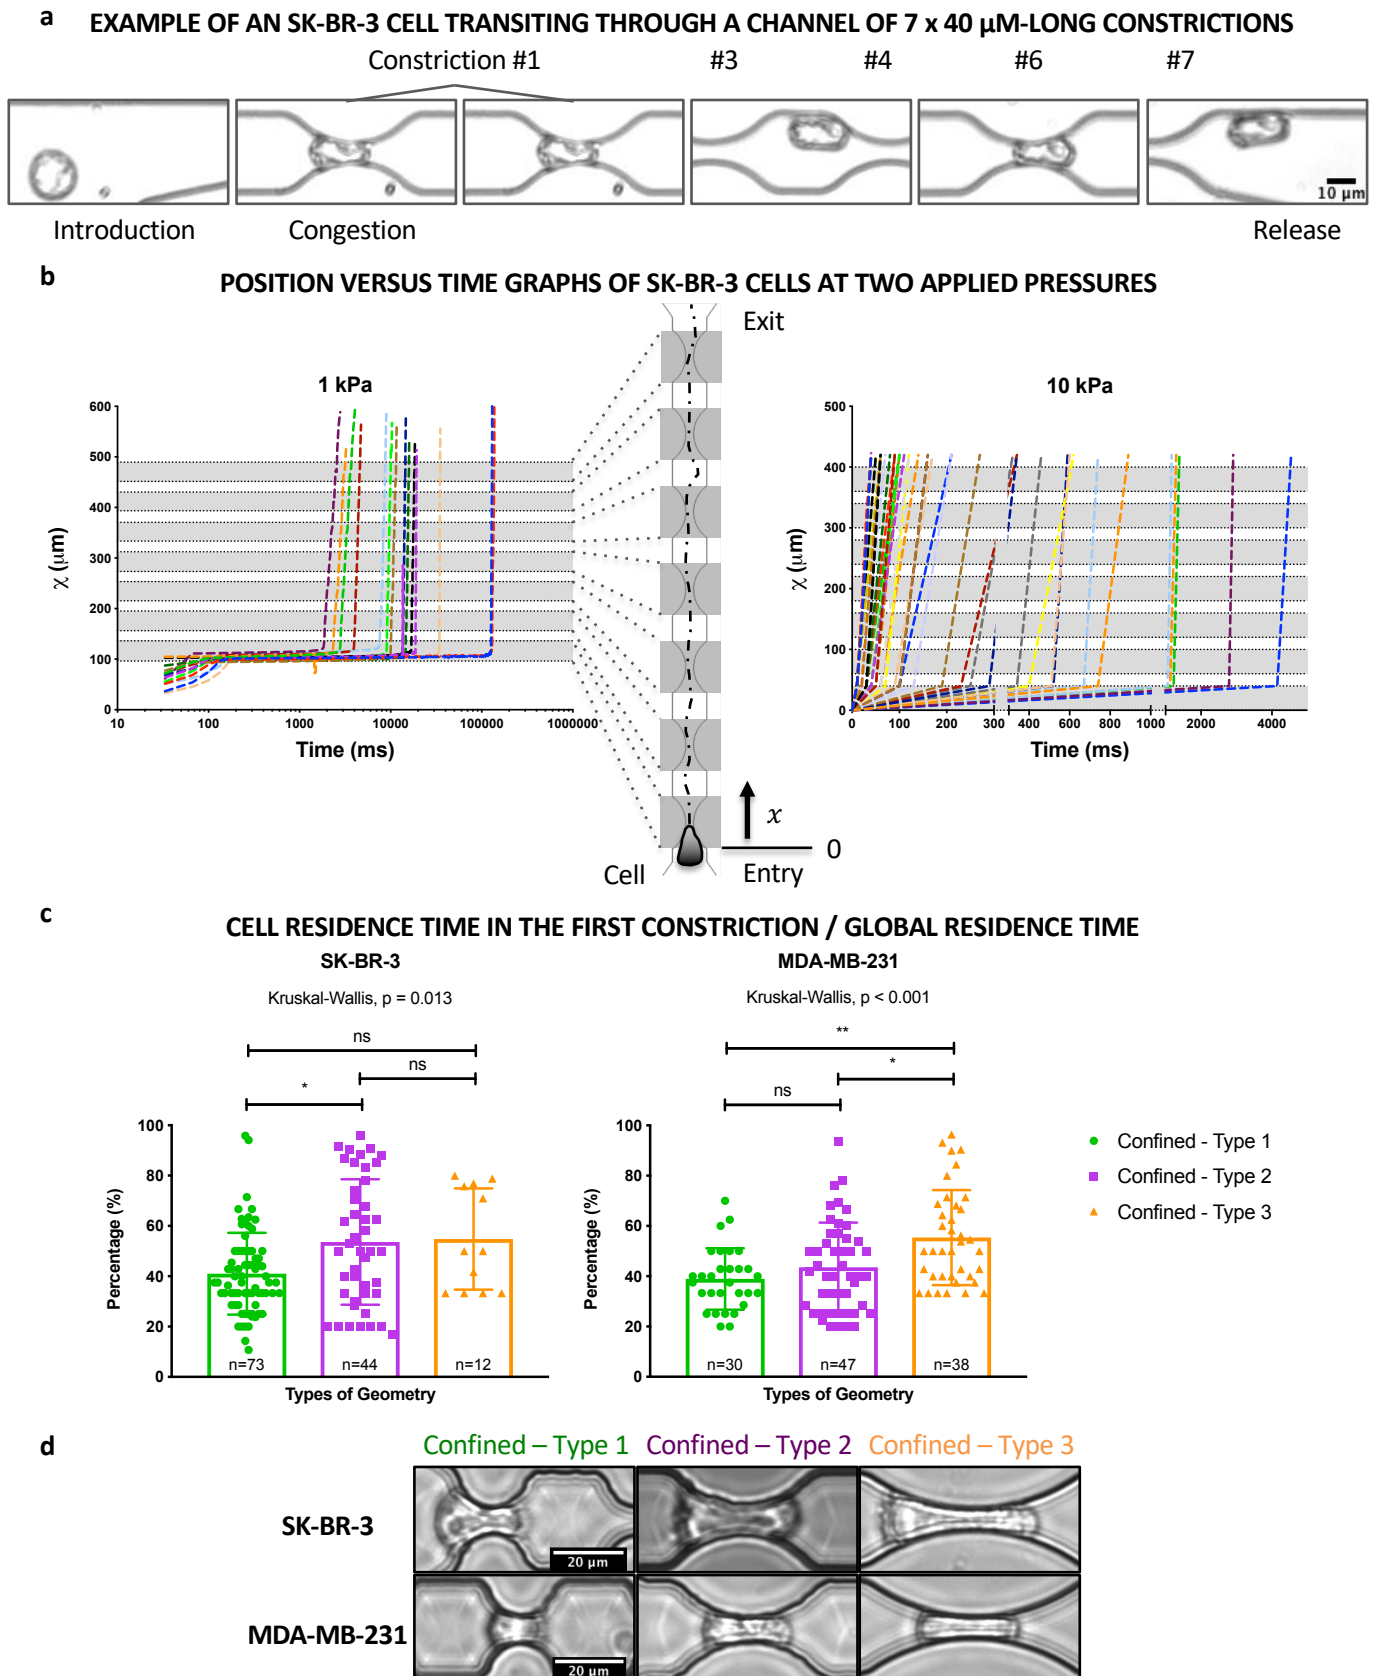

**Figure 2** Transit and residence times of metastatic breast cancer cells in the microfluidic system at a constant applied pressure of 10 kPa. **(a)** Example of an SK-BR-3 cell transiting through a microfluidic channel with constrictions. **(b)** Position versus time graphs of SK-BR-3 cells transiting through the same type of microfluidic channel at 1 (left) and 10 (right) kPa. **(c)** Percentages of cell residence time in the first constrictions for SK-BR-3 (left) and MDA-MB-231 (right) cells in three types of microfluidic channels with micro constrictions. Error bars represent standard deviation. Dunn's multiple comparisons post hoc test. \*, significance level at 0.033; \*\*, significance level at 0.002; \*\*\*, significance level < 0.001; ns, not significant. **(d)** Brightfield images of SK-BR-3 and MDA-MB-231 cells residing in the three types of micro constrictions.

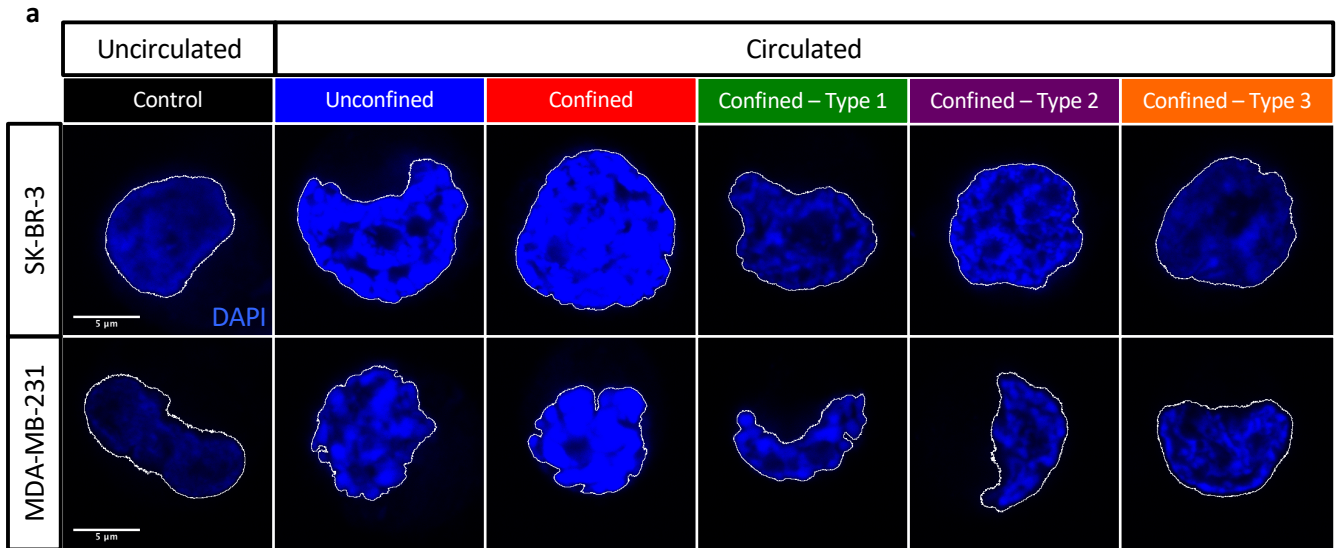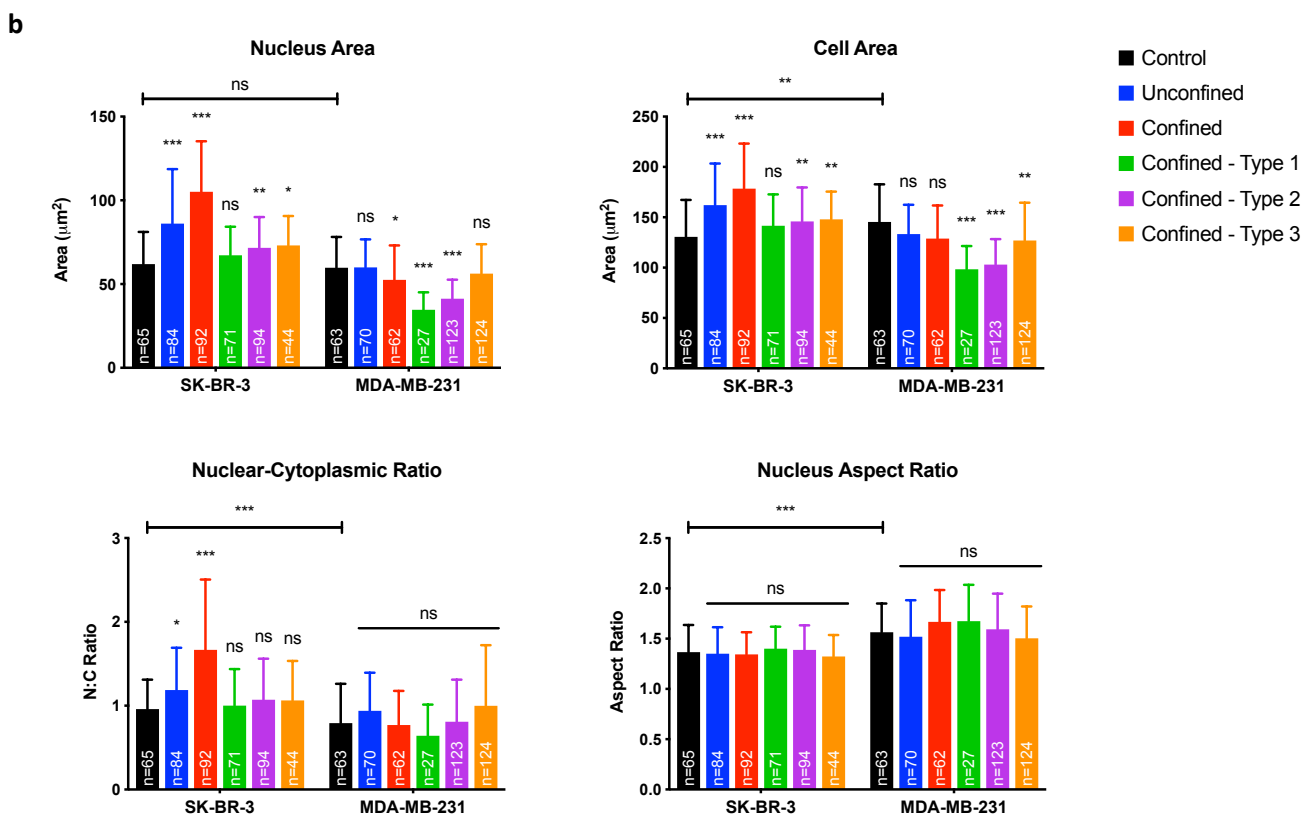

**Figure 3** Morphological analysis of SK-BR-3 and MDA-MB-231 cells post-circulation, -confinement and -constrictions at a constant applied pressure of 10 kPa. **(a)** DAPI staining of SK-BR-3 (top row) and MDA-MB-231 (bottom row) cells. **(b)** Quantifications of nucleus area, cell area, N:C ratio and nucleus AR of SK-BR-3 and MDA-MB-231 cells. Error bars represent standard deviation. Mann-Whitney U test, two-tailed used to compare control groups between cell types. Dunn's multiple comparisons post hoc test. \*, significance level at 0.033; \*\*, significance level at 0.002; \*\*\*, significance level < 0.001; ns, not significant.

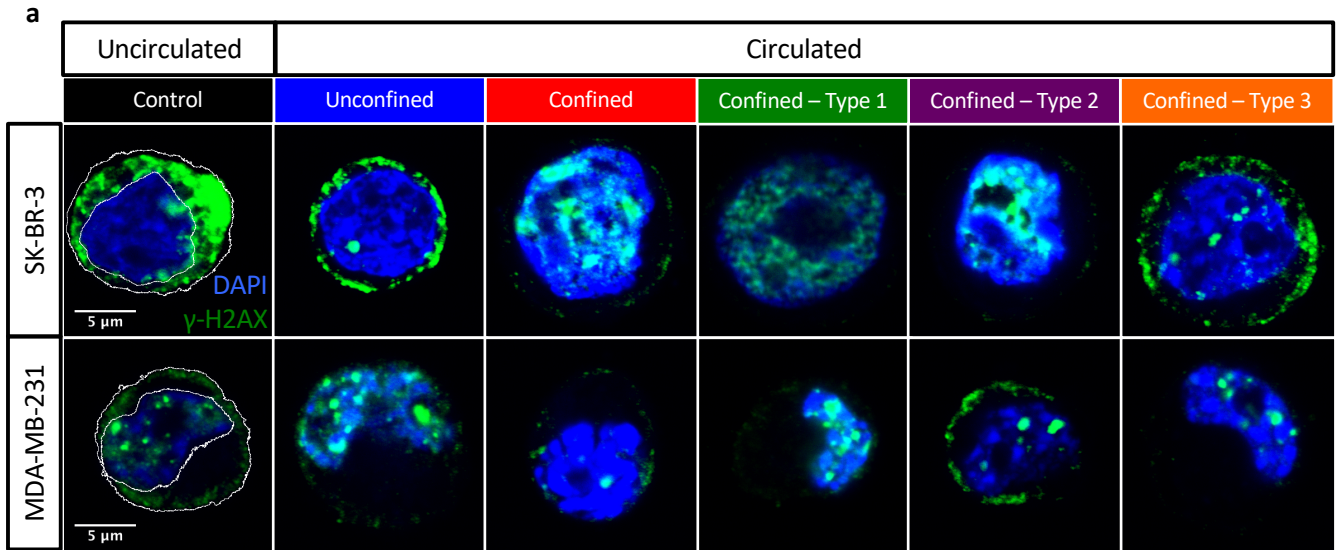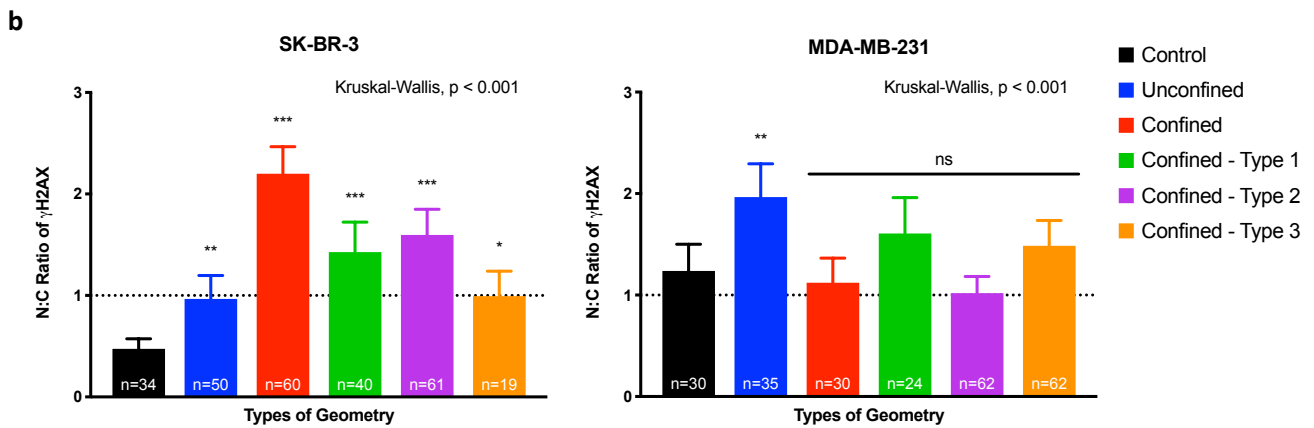

**Figure 4** Genome integrity analysis of SK-BR-3 and MDA-MB-231 cells post-circulation, -confinement and -constrictions at a constant applied pressure of 10 kPa. **(a)** DAPI (blue) and  $\gamma$ -H2AX (green) staining of SK-BR-3 (top row) and MDA-MB-231 (bottom row) cells. **(b)** Quantifications of nuclear to cytoplasmic ratios of  $\gamma$ -H2AX integrated densities. Cytoplasmic co-localization – N:C ratio  $< 1$ ; nuclear co-localization – N:C ratio  $> 1$ . Error bars represent standard deviation. Dunn’s multiple comparisons post hoc test. \*, significance level at 0.033; \*\*, significance level at 0.002; \*\*\*, significance level  $< 0.001$ ; ns, not significant.

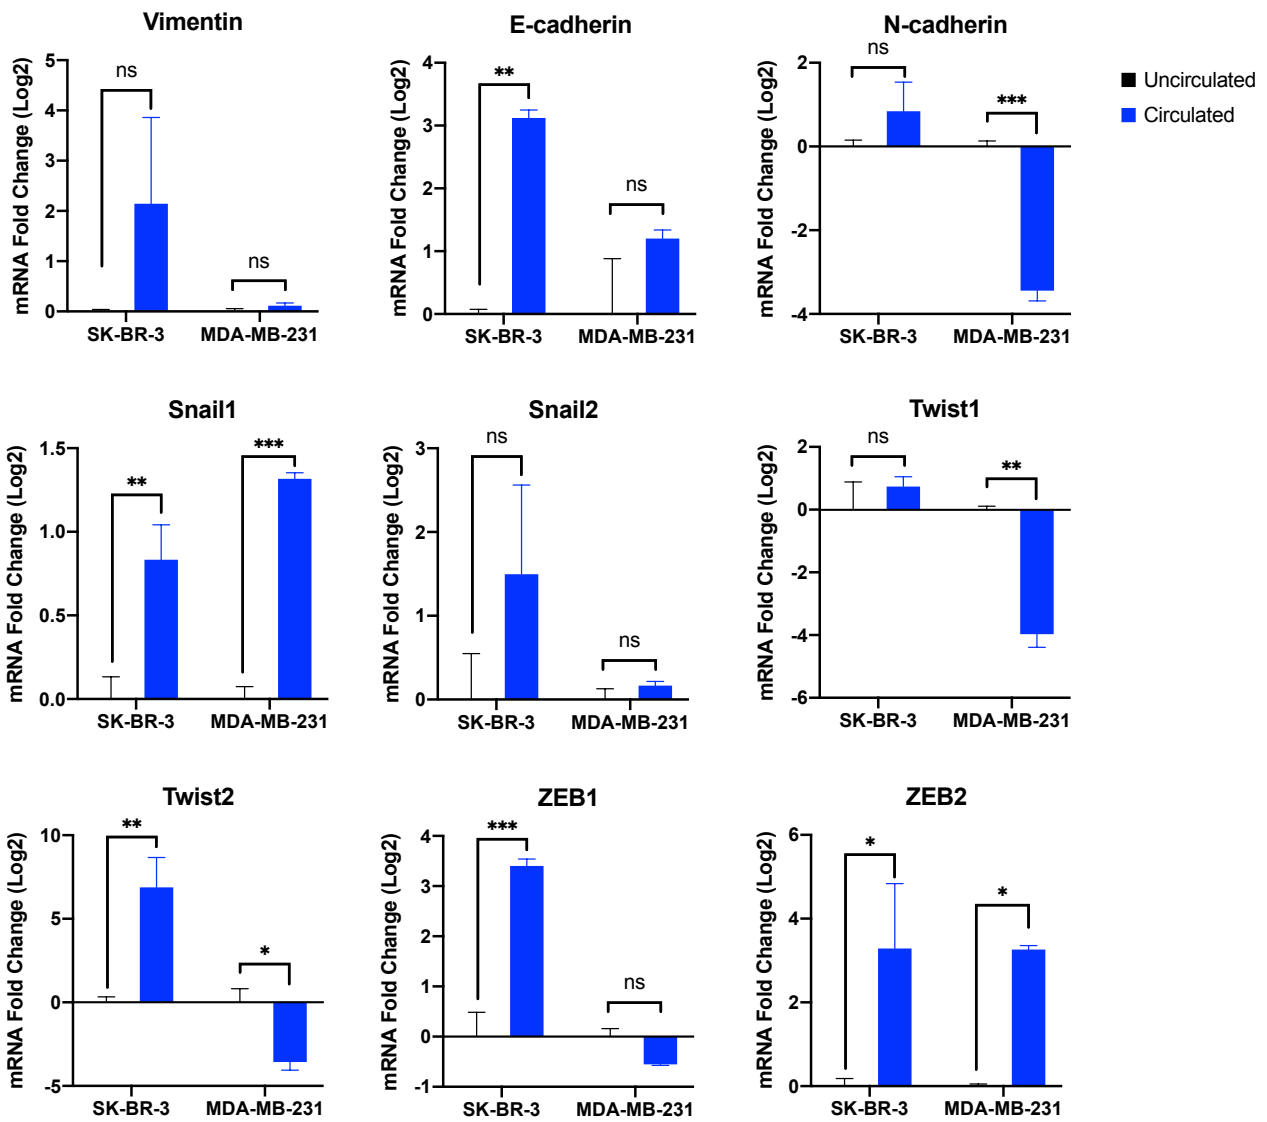

**Figure 5** Relative expression (log<sub>2</sub>, mean ± s.e.m.) of Vimentin, E-cadherin, N-cadherin, Snail1, Snail2, Twist1, Twist2, ZEB1 and ZEB2 tested in two metastatic breast cancer cell types (n=3 per transcript). Holm-Sidak multiple comparisons post hoc test used to compare relative expression of all transcripts in cells in the uncirculated group with the circulated group. \*, significance level at 0.033; \*\*, significance level at 0.002; \*\*\*, significance level < 0.001; ns, not significant.

a

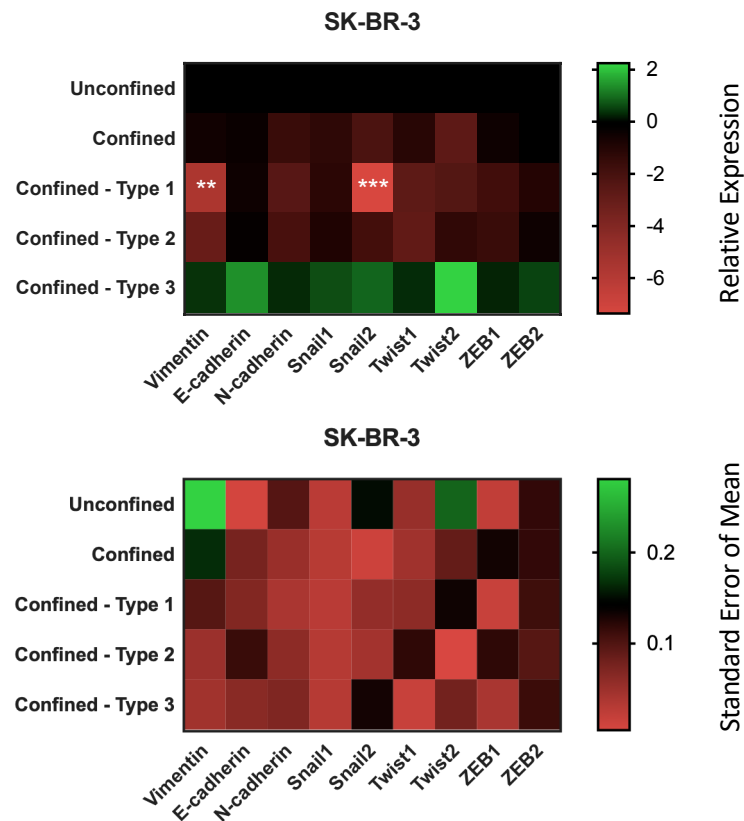

b

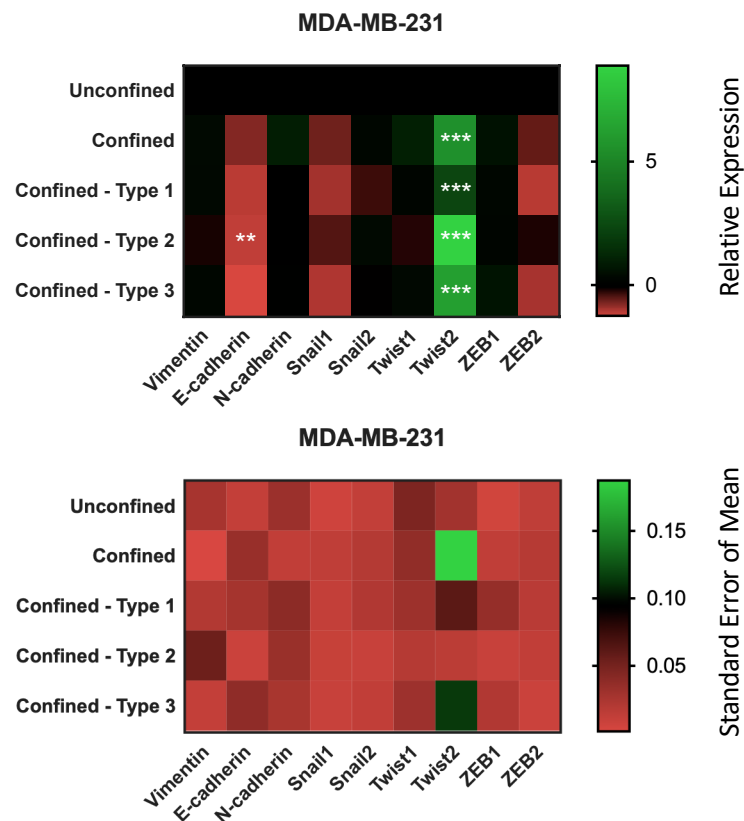

**Figure 6** Heat map illustration of relative expression (log<sub>2</sub>, mean) and standard error of mean (normalized to the absolute mean) of Vimentin, E-cadherin, N-cadherin, Snail1, Snail2, Twist1, Twist2, ZEB1 and ZEB2 tested in two metastatic breast cancer cell types (n=3 per transcript). Holm-Sidak multiple comparisons post hoc test used to compare relative expression of all transcripts in cells in the confined groups with the unconfined group. \*, significance level at 0.033; \*\*, significance level at 0.002; \*\*\*, significance level < 0.001; ns, not significant. **(a)** SK-BR-3 cells. **(b)** MDA-MB-231 cells.

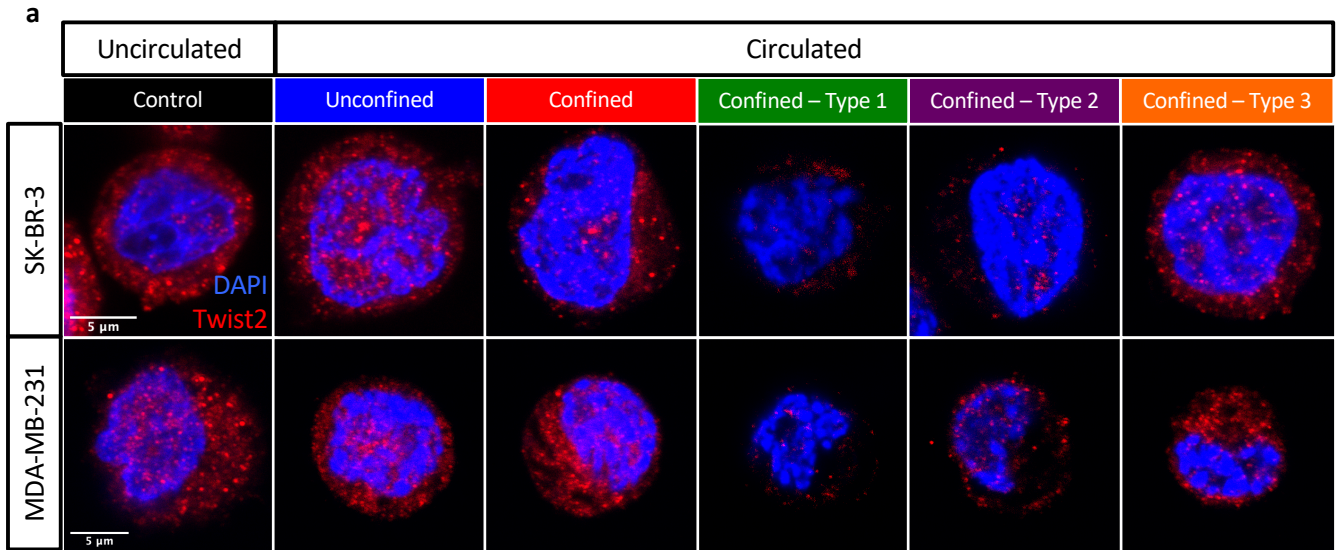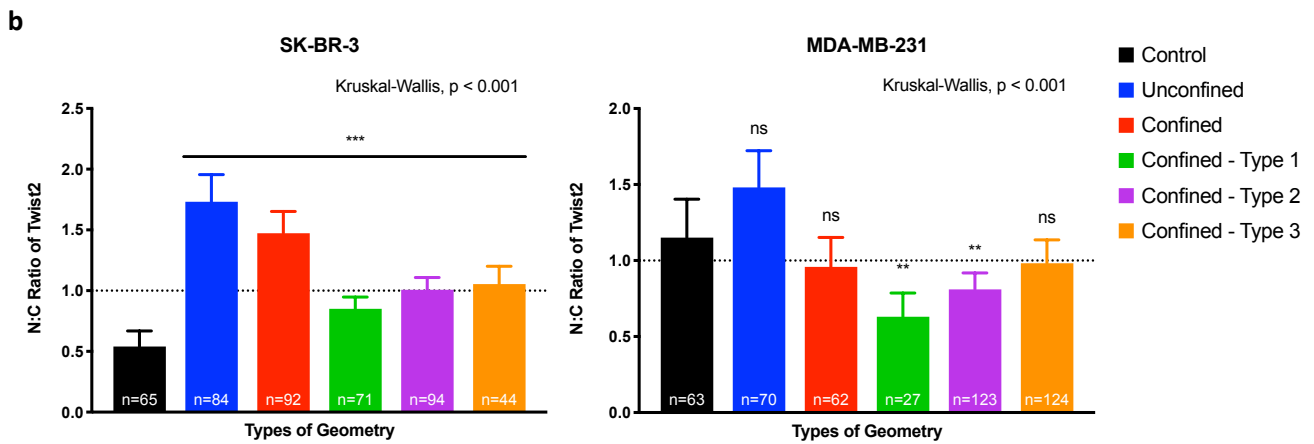

**Figure 7** Immunofluorescent analysis of SK-BR-3 and MDA-MB-231 cells post-circulation, -confinement and -constrictions at a constant applied pressure of 10 kPa using Twist2 antibody. **(a)** DAPI (blue) and Twist2 (red) staining of SK-BR-3 (top row) and MDA-MB-231 (bottom row) cells. **(b)** Quantifications of nuclear to cytoplasmic ratios of Twist2 integrated densities. Cytoplasmic co-localization – N:C ratio < 1; nuclear co-localization – N:C ratio > 1. Error bars represent standard deviation. Dunn’s multiple comparisons post hoc test. \*, significance level at 0.033; \*\*, significance level at 0.002; \*\*\*, significance level < 0.001; ns, not significant.

Total Length of Channel: 420  $\mu\text{m}$

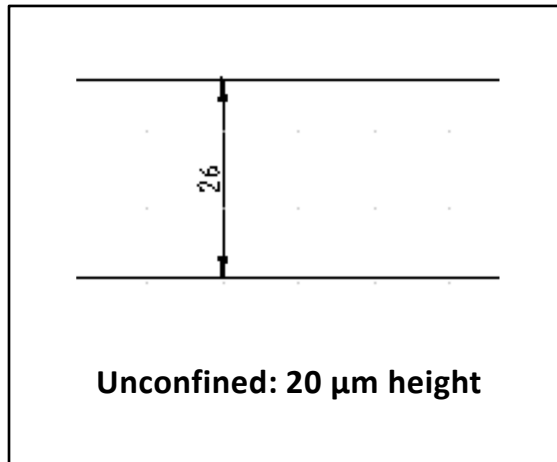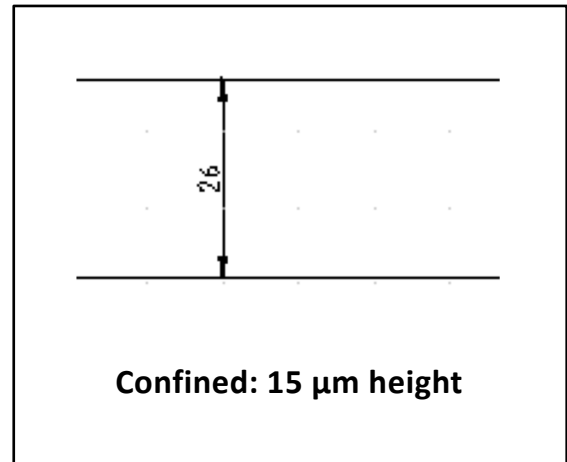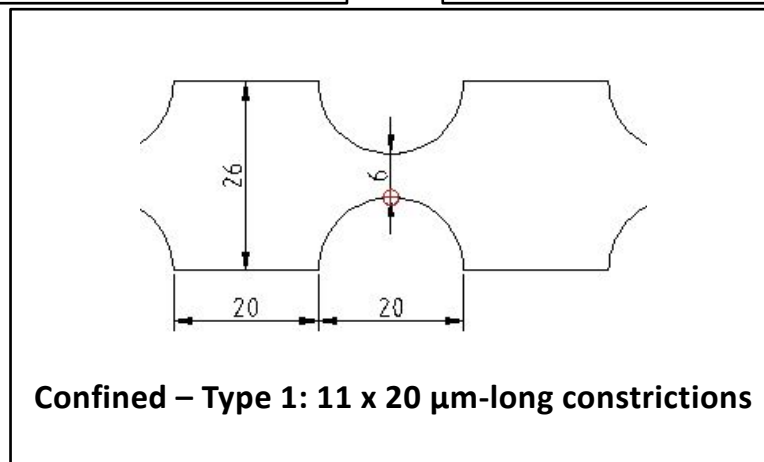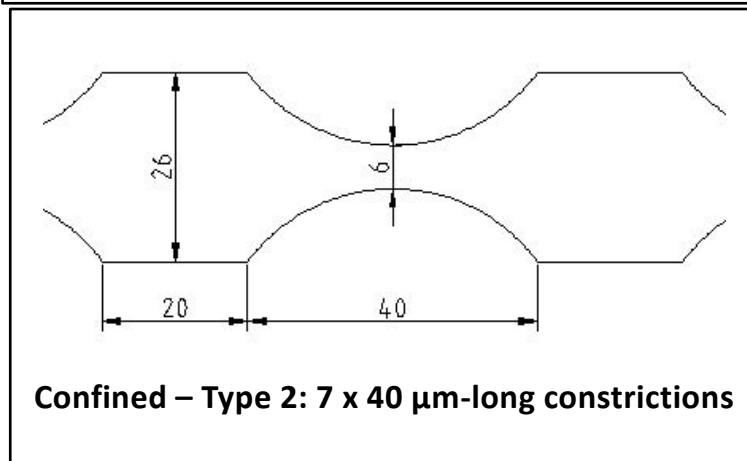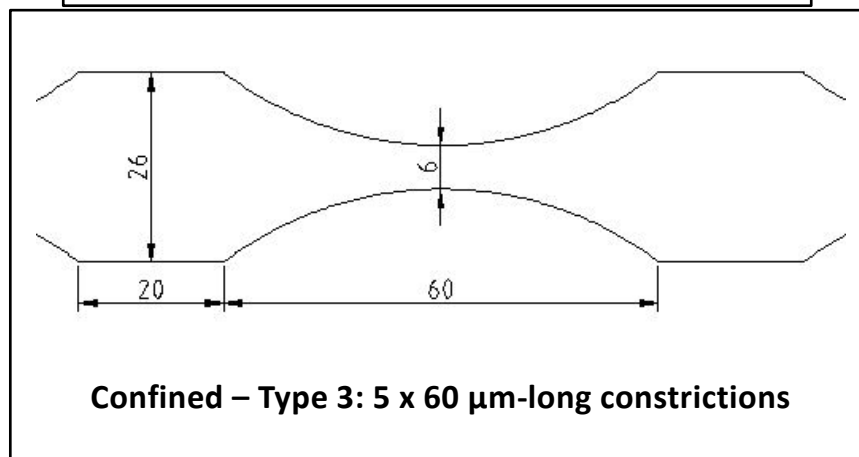

Supplementary Figure 1 Types of two-dimensional geometrical designs. Dimensions are in micrometers.



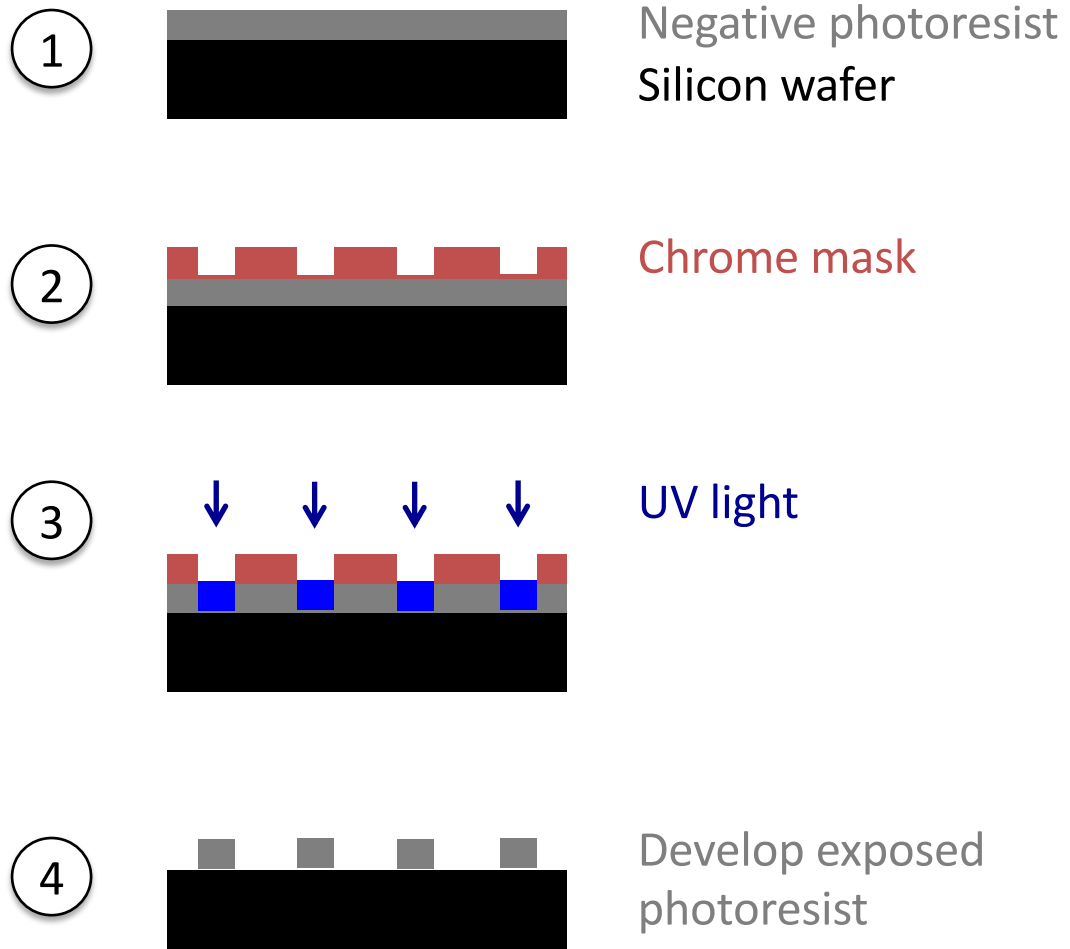

**Supplementary Figure 2** Fabrication of silicon master mold.

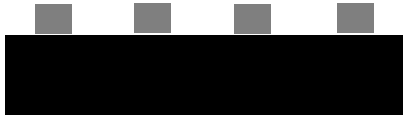

1. Silicon master mold

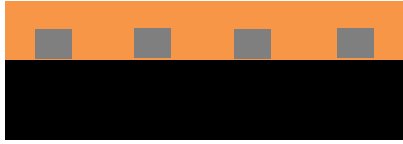

2. Cast and cure PDMS

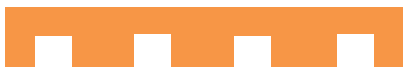

3. Separate PDMS from mold

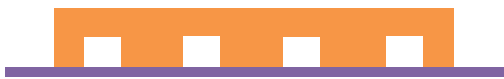

4. Bond PDMS and glass slide by oxygen plasma treatment

**Supplementary Figure 3** Fabrication of a microfluidic PDMS chip.

a

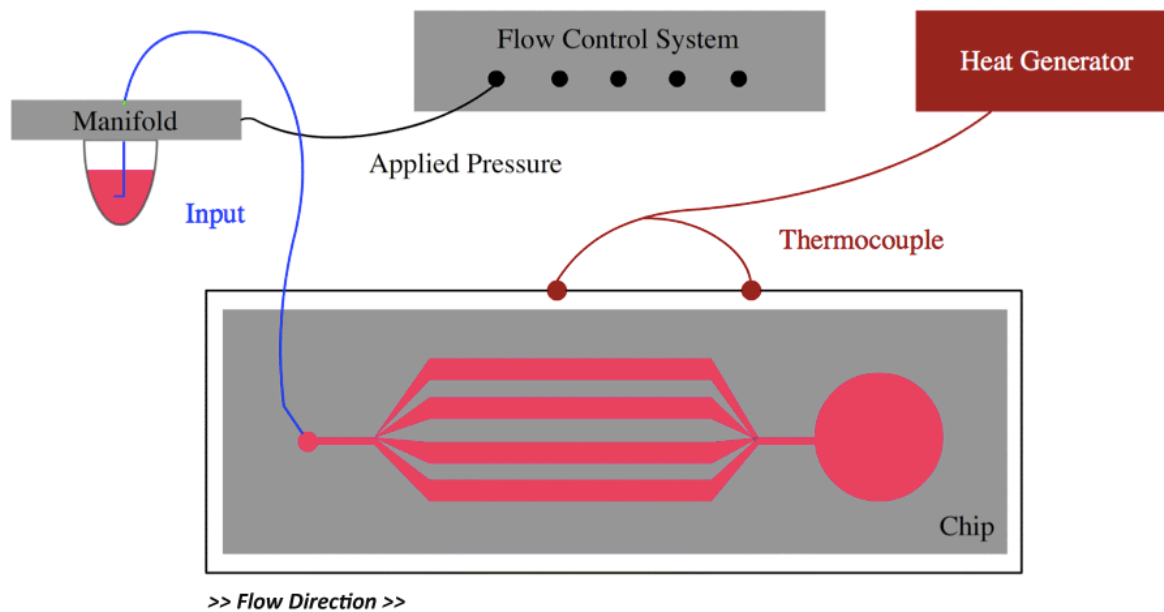

Chip is ready for cells and mounted on a 37°C stage.

b

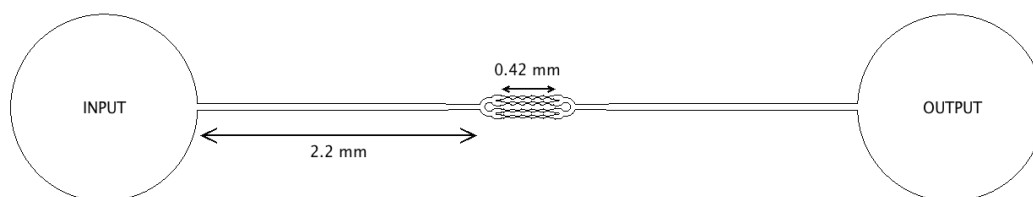

**Supplementary Figure 4** Experimental set-up of the microfluidic system. **(a)** Overall set-up of the microfluidic system. **(b)** The microfluidic chip consists of 4-parallel channels. Each channel is 420  $\mu\text{m}$  in length. The model comes with channels with different lengths of constriction geometry as illustrated in Supplementary Fig. 1.

a

| SK-BR-3                                                                       |                             |                             |                             |                     |
|-------------------------------------------------------------------------------|-----------------------------|-----------------------------|-----------------------------|---------------------|
| Parameters                                                                    | Confined – Type 1<br>(n=73) | Confined – Type 2<br>(n=44) | Confined – Type 3<br>(n=12) | Kruskal-Wallis Test |
| Velocity (mm/s)                                                               | 4.86 ± 2.89                 | 3.84 ± 3.01                 | 2.82 ± 1.91                 | P<0.001 (***)       |
| Global Transit Time<br>(ms)                                                   | 204 ± 339                   | 438 ± 822                   | 662 ± 1653                  | P=0.023 (*)         |
| Transit Time across<br>the First Constriction<br>(ms)                         | 116 ± 253                   | 358 ± 769                   | 498 ± 1333                  | P=0.017 (*)         |
| Transit Time (1 <sup>st</sup><br>Constriction) / Transit<br>Time (Global) (%) | 41 ± 16                     | 54 ± 25                     | 55 ± 20                     | P=0.013 (*)         |

b

| MDA-MB-231                                                                    |                             |                             |                             |                     |
|-------------------------------------------------------------------------------|-----------------------------|-----------------------------|-----------------------------|---------------------|
| Parameters                                                                    | Confined – Type 1<br>(n=30) | Confined – Type 2<br>(n=47) | Confined – Type 3<br>(n=38) | Kruskal-Wallis Test |
| Velocity (mm/s)                                                               | 7.93 ± 3.54                 | 6.36 ± 3.11                 | 4.61 ± 2.45                 | P<0.001 (***)       |
| Global Transit Time<br>(ms)                                                   | 73.3 ± 69.3                 | 95.5 ± 78.2                 | 219 ± 492                   | P<0.001 (***)       |
| Transit Time across<br>the First Constriction<br>(ms)                         | 33.7 ± 50.6                 | 52.3 ± 71.8                 | 172 ± 481                   | P<0.001 (***)       |
| Transit Time (1 <sup>st</sup><br>Constriction) / Transit<br>Time (Global) (%) | 38.9 ± 12.2                 | 43.6 ± 17.8                 | 55.4 ± 18.9                 | P<0.001 (***)       |

**Supplementary Table 1** Summary of transit time data from three types of microfluidic geometry (confined with varying lengths of constrictions) at a constant applied pressure of 10 kPa. Values are presented as (mean ± s.d.). Kruskal-Wallis test. \*, significance level at 0.033; \*\*, significance level at 0.002; \*\*\*, significance level < 0.001; ns, not significant. **(a)** SK-BR-3 cells. **(b)** MDA-MB-231 cells.

a

| Thickness ( $\mu\text{m}$ ) | Spin-coating Time (s) | Spin-coating Speed (rpm) | Soft Bake Time (min) |
|-----------------------------|-----------------------|--------------------------|----------------------|
| 20                          | 30                    | 1000                     | 3.5                  |
| 15                          | 30                    | 1500                     | 3                    |

b

| Thickness ( $\mu\text{m}$ ) | Exposure Energy ( $\text{mJ}/\text{cm}^2$ ) | Exposure Time (s) | Post Exposure Bake Time (min) |
|-----------------------------|---------------------------------------------|-------------------|-------------------------------|
| 20                          | 145                                         | 16                | 4.5                           |
| 15                          | 140                                         | 17                | 4                             |

c

| Thickness ( $\mu\text{m}$ ) | Development Time (min) | Shaker Speed (rpm) |
|-----------------------------|------------------------|--------------------|
| 20                          | 3.5                    | 100                |
| 15                          | 3                      | 100                |

**Supplementary Table 2** Parameters for optical photolithography. **(a)** Conditions for spin-coating and soft bake. **(b)** Optimal exposure dosage and post exposure bake. **(c)** Development times for SU-8 developer.

a

| Gene Symbol | Gene Name     | Forward Sequence (5' – 3') | Reverse Sequence (5' – 3') |
|-------------|---------------|----------------------------|----------------------------|
| VIM         | Vimentin      | GGAAACTAATCTGGATTCACTC     | CATCTCTAGTTTCAACCGTC       |
| CDH1        | E-cadherin    | CCGAGAGCTACACGTTC          | TCTTCAAAATTCACCTCTGCC      |
| CDH2        | N-cadherin    | ACATATGTGATGACCGTAAC       | TTTTTCTCGATCAAGTCCAG       |
| SNAI1       | Snail1        | CTCTAATCCAGAGTTTACCTTC     | GACAGAGTCCCAGATGAG         |
| SNAI2       | Snail2 / Slug | CAGTGATTATTTCCCGTATC       | CCCCAAAGATGAGGAGTATC       |
| TWIST1      | Twist1        | CTAGATGTCATTGTTTCCAGAG     | CCCTGTTTCTTTGAATTTGG       |
| TWIST2      | Twist2        | CATAGACTTCTCTACCAGG        | CATCATTGAGAATCTCTCTCC      |
| ZEB1        | ZEB1          | AAAGATGATGAATGCGAGTC       | TCCATTTTCATCATGACCAC       |
| ZEB2        | ZEB2          | AAGACTTCGCAGATCGAG         | TGATAAGAGCGGATCAGATG       |
| GAPDH       | GAPDH         | ACAGTTGCCATGTAGACC         | TTGAGCACAGGGTACTTTA        |

b

|         | PCR Stage                       | Temperature      | Time   |
|---------|---------------------------------|------------------|--------|
| Stage 1 | Hold                            | 95°C             | 10 min |
| Stage 2 | Cycle (40 Cycles)               |                  |        |
|         | Denature                        | 95°C             | 15 s   |
|         | Anneal/Extend                   | 60°C             | 60 s   |
| Stage 3 | Melt Curve (Dissociation Stage) | 95°C             | 10 s   |
|         |                                 | 0.2°C Increments |        |
|         |                                 | 60°C to 95°C     | 10 s   |

**Supplementary Table 3** The mRNA primers and thermal cycling conditions for amplification. **(a)** The mRNA primers. **(b)** Thermal cycling conditions for cDNA amplification.

| <b>Primary Antibody Cocktail</b>                                                                   |                                    |                       |        |                |
|----------------------------------------------------------------------------------------------------|------------------------------------|-----------------------|--------|----------------|
| <b>Antibody</b>                                                                                    | Catalog                            | Initial Concentration | Host   | Final Dilution |
| <b>TWIST2 Polyclonal Antibody</b>                                                                  | PA5-66539, ThermoFisher Scientific | 0.3 mg/mL             | Rabbit | 1:200          |
| <b>Phospho-Histone H2A.X (Ser140) Monoclonal Antibody (3F2)</b>                                    | MA1-2022, ThermoFisher Scientific  | 1 mg/mL               | Mouse  | 1:500          |
| <b>Secondary Antibody Cocktail</b>                                                                 |                                    |                       |        |                |
| <b>Antibody</b>                                                                                    | Catalog                            | Final Dilution        |        |                |
| <b>Goat anti-Rabbit IgG (H+L) Secondary Antibody, Alexa Fluor® 594 conjugate</b>                   | R37117, ThermoFisher Scientific    | 1:200                 |        |                |
| <b>F(ab')<sub>2</sub>-Goat anti-Mouse IgG (H+L) Secondary Antibody, Alexa Fluor® 488 conjugate</b> | A-11017, ThermoFisher Scientific   | 1:200                 |        |                |

**Supplementary Table 4** Primary and secondary antibody cocktails.
